1                   **Substrate access mechanism in a novel membrane-bound**  
2                   **phospholipase A of *Pseudomonas aeruginosa* concordant with**  
3                   **specificity and regioselectivity**

4  
5                   Sabahuddin Ahmad<sup>1</sup>, Christoph Heinrich Strunk<sup>2</sup>, Stephan N. Schott-  
6                   Verdugo<sup>1,3,5</sup>, Karl-Erich Jaeger<sup>2,4</sup>, Filip Kovacic<sup>2,\*</sup>, Holger Gohlke<sup>1,5,\*</sup>  
7

- 8  
9  
10                  1. Institute for Pharmaceutical and Medicinal Chemistry, Heinrich Heine  
11                  University Düsseldorf, 40225 Düsseldorf, Germany  
12                  2. Institute of Molecular Enzyme Technology, Heinrich Heine University  
13                  Düsseldorf, Forschungszentrum Jülich GmbH, 52425 Jülich, Germany  
14                  3. Centro de Bioinformática y Simulación Molecular (CBSM), Faculty of  
15                  Engineering, University of Talca, 3460000 Talca, Chile  
16                  4. Institute of Bio- and Geosciences (IBG-1: Biotechnology),  
17                  Forschungszentrum Jülich GmbH, 52425 Jülich, Germany  
18                  5. John von Neumann Institute for Computing (NIC), Jülich Supercomputing  
19                  Centre (JSC), Institute of Biological Information Processing (IBI-7:  
20                  Structural Biochemistry) & Institute of Bio- and Geosciences (IBG-4:  
21                  Bioinformatics), Forschungszentrum Jülich GmbH, 52425 Jülich, Germany  
22

23  
24                  \* Corresponding authors

25  
26                  Address correspondence to: Prof. Dr. Holger Gohlke, Institute for  
27                  Pharmaceutical and Medicinal Chemistry, Heinrich Heine University  
28                  Düsseldorf, Düsseldorf, Germany; John von Neumann Institute for Computing  
29                  (NIC), Jülich Supercomputing Centre (JSC), Institute of Biological Information  
30                  Processing (IBI-7: Structural Biochemistry) & Institute of Bio- and Geosciences  
31                  (IBG-4: Bioinformatics), Forschungszentrum Jülich GmbH, 52425 Jülich,  
32                  Germany; Phone: (+49) 211 81 13662; Email: [gohlke@uni-duesseldorf.de](mailto:gohlke@uni-duesseldorf.de),  
33                  [h.gohlke@fz-juelich.de](mailto:h.gohlke@fz-juelich.de) and Dr. Filip Kovacic, Institute of Molecular Enzyme  
34                  Technology, Heinrich Heine University Düsseldorf, Forschungszentrum Jülich  
35                  GmbH, 52425 Jülich, Germany; Phone: (+49) 2461 61 2947; Email:  
36                  [f.kovacic@fz-juelich.de](mailto:f.kovacic@fz-juelich.de)  
37

38  
39  
40                  **Running title:** Substrate access in PlaF

41  
42                  **Keywords:** membrane protein, phospholipid, mutagenesis, molecular  
43                  dynamics simulations, free energy computations

## 44 **Abstract**

45 PlaF is a cytoplasmic membrane-bound phospholipase  $A_1$  from *Pseudomonas*  
46 *aeruginosa* that alters the membrane glycerophospholipid (GPL) composition and  
47 fosters the virulence of this human pathogen. PlaF activity is regulated by a dimer-to-  
48 monomer transition followed by tilting of the monomer in the membrane. However, how  
49 substrates reach the active site and how the characteristics of the active site tunnels  
50 determine the activity, specificity, and regioselectivity of PlaF for natural GPL  
51 substrates has remained elusive. Here, we combined unbiased and biased all-atom  
52 molecular dynamics (MD) simulations and configurational free energy computations to  
53 identify access pathways of GPL substrates to the catalytic center of PlaF. Our results  
54 map out a distinct tunnel through which substrates access the catalytic center. PlaF  
55 variants with bulky tryptophan residues in this tunnel revealed decreased catalysis  
56 rates due to tunnel blockage. The MD simulations suggest that GPLs preferably enter  
57 the active site with the *sn*-1 acyl chain first, which agrees with the experimentally  
58 demonstrated PLA<sub>1</sub> activity of PlaF. We propose that the acyl chain-length specificity  
59 of PlaF is determined by the structural features of the access tunnel, which results in  
60 favorable free energy of binding of medium-chain GPLs. The suggested egress route  
61 conveys fatty acid products to the dimerization interface and, thus, contributes to  
62 understanding the product feedback regulation of PlaF by fatty acid-triggered  
63 dimerization. These findings open up opportunities for developing potential PlaF  
64 inhibitors, which may act as antibiotics against *P. aeruginosa*.

65

## 66 Introduction

67 *Pseudomonas aeruginosa* is an opportunistic and versatile pathogen, which causes  
68 infections in plants [1] and humans [2]. It is a multi-drug resistant Gram-negative  
69 bacterium and a frequent cause of nosocomial infections [3]. The pathogenicity of *P.*  
70 *aeruginosa* relies on both cell-associated and extracellular virulence factors [3]. Among  
71 those virulence factors are phospholipases [4, 5], including phospholipase A<sub>1</sub> (PLA<sub>1</sub>),  
72 which hydrolyze cellular glycerophospholipids (GPLs) at the *sn*-1 position into  
73 lysoglycerophospholipids (LGPLs) and fatty acids (FAs) [6, 7].

74 GPLs primarily form bilayers, which maintain a permeability barrier for cells and  
75 organelles [8], while membrane-bound LGPLs can destabilize membrane integrity in  
76 Gram-negative bacteria [9, 10]. GPLs [11] and LGPLs [12, 13] can regulate the function  
77 and stability of membrane proteins. Interestingly, biofilm formation and growth phase  
78 transitions in *P. aeruginosa* are accompanied by the alteration of membrane GPL  
79 composition [14, 15]. FAs belong to the diffusible signal factor family (DSF) and are  
80 possible signal molecules because they can diffuse through cell membranes and  
81 contribute to the regulation of diverse biological functions in various Gram-negative  
82 pathogens [16]. In *P. aeruginosa*, DSFs promote biofilm formation and antibiotic  
83 resistance [17, 18].

84 We recently identified PlaF, an integral, inner membrane PLA<sub>1</sub> that has a profound role  
85 for membrane GPL remodeling in *P. aeruginosa*. Furthermore, a *P. aeruginosa*  $\Delta$ *plaF*  
86 knockout strain showed strongly attenuated virulence in *Galleria mellonella* and human  
87 macrophages models compared to the wild-type, which suggests that PlaF-mediated  
88 GPL remodeling contributes to the virulence of *P. aeruginosa* [19]. Crosslinking (*in vivo*  
89 and *in vitro*) and micro-scale thermophoresis experiments showed that PlaF exists in  
90 both monomeric and dimeric configurations, although it is active only in the monomeric  
91 state [19]. The crystal structure of PlaF revealed that a homodimer is formed by  
92 interactions between the transmembrane (TM) and juxtamembrane (JM) regions [19].  
93 The homodimer contains co-crystallized endogenous ligands, myristic acid (MYR) and

94 undecanoic acid (UND) from *P. aeruginosa*, (Figure 1), which are non-covalently bound  
95 in the active site cavity [19]. Moreover, a complex T-shaped active site pocket formed  
96 by the TM, JM, and catalytic domain revealed three openings, one at the dimer  
97 interface, one close to the catalytic serine (S137), and one most likely pointing towards  
98 the membrane [19]. Molecular simulations of PlaF activation revealed a mechanism  
99 that involves a dimer-to-monomer transition followed by tilting of the monomer in the  
100 membrane [19]. The tilting orients PlaF in a configuration relative to the membrane  
101 such that substrates can directly access the cleft (Figure 1). By contrast, in the  
102 configuration observed in the crystal structure, the residues lining the opening of the  
103 active site cleft are more than 5 Å above the membrane surface (Figure 1). However,  
104 it is unknown how substrates reach the active site and how the characteristics of the  
105 active site determine the activity, specificity, and regioselectivity of PlaF for medium-  
106 chain GPLs.

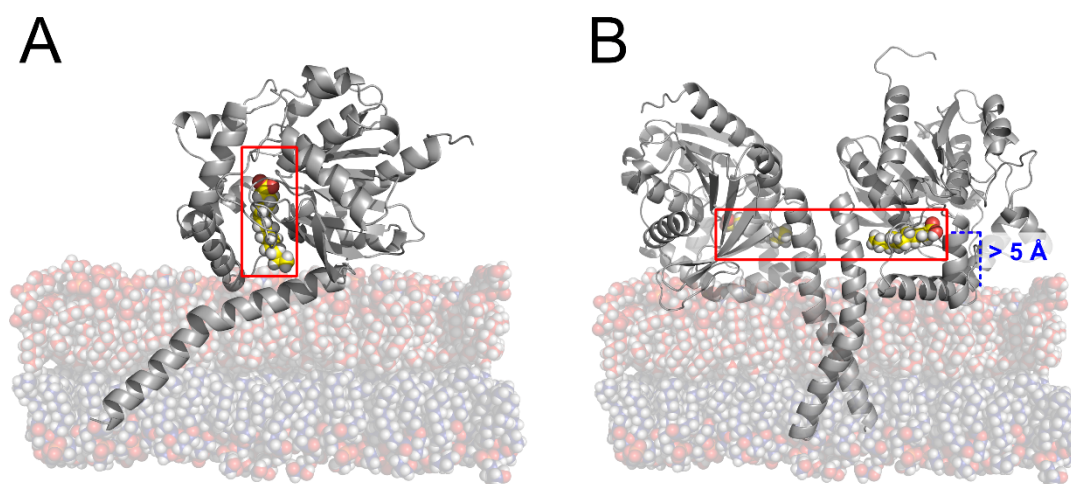

107  
108 **Figure 1: Schematic representation of the orientation of PlaF in the membrane.** A) Chain A  
109 of dimeric PlaF in the tilted state; this state allows direct contact of the active site tunnel (red  
110 box) with the membrane. Yellow spheres represent the C atoms of the co-crystallized PlaF  
111 product, MYR. B) In dimeric PlaF, the active site tunnel is located > 5 Å above the membrane.  
112 Yellow spheres represent the C atoms of the co-crystallized PlaF products, MYR (left) and UND  
113 (right), within the active site tunnel.

114 The molecular mechanism underlying the access and binding of GPL to PLA is poorly  
115 understood in general because only a few PLA structures from microorganisms have  
116 been resolved, which either revealed closed conformations of their phospholipase  
117 domains [4, 20] or an accessible pocket that is predominantly hydrophobic [21] or

118 amphipathic [22]. For the latter, regioselectivity was suggested to be achieved through  
119 binding of the GPL phosphate group to the polar pocket, which constrains the *sn*-1 acyl  
120 chain in a neighboring hydrophobic pocket [22]. Finally, structural analysis of the outer  
121 membrane PLA (OMPLA) from *Escherichia coli* in the complex with an inhibitor  
122 provided information about GPL recognition by this PLA [23, 24]. However, OMPLA is  
123 an integral  $\beta$ -barrel protein with a hydrophobic GPL binding cleft and the active site  
124 located at the  $\beta$ -barrel exterior. Hence, the mechanism by which PlaF recognizes GPL  
125 substrates must be conceptually different from that of OMPLA.

126 Here, we combined unbiased and biased all-atom molecular dynamics (MD)  
127 simulations and configurational free energy computations to identify access pathways  
128 to the catalytic center of PlaF. The results were validated by mutational and enzymatic  
129 studies on PlaF variants with blocked substrate access. Our results map out a distinct  
130 tunnel for substrate access within PlaF, provide explanations for the substrate  
131 specificity and PLA<sub>1</sub> activity of PlaF, and suggest egress routes for hydrolysis products.  
132 These findings enhance our understanding of the mechanism by which membrane  
133 protein function is regulated through protein-GPL interactions.

134

## 135 **Results**

### 136 **Access pathways to the catalytic site in PlaF**

137 The crystal structure of PlaF revealed three pronounced tunnels, forming a large, T-  
138 shaped active site cleft. This cleft is compatible with binding bulky GPL substrates [19].  
139 However, the structural dynamics of biomolecules may lead to variations in the tunnel  
140 shape [25]. Therefore, we reanalyzed trajectories from 10 replicas of unbiased MD  
141 simulations of 2  $\mu$ s length for each of the systems di-PlaF (dimeric PlaF), PlaF<sub>A</sub> (chain  
142 A from the crystal structure), PlaF<sub>B</sub> (chain B from the crystal structure), and t-PlaF<sub>A</sub>  
143 (chain A from the crystal structure in a tilted orientation) from our previous work [19]  
144 using CAVER [26]. CAVER analyzes and visualizes tunnels and channels in protein  
145 structures.

146 We primarily focus on t-PlaF<sub>A</sub> because the tilted structure is likely the catalytically  
147 active form [19]. We identified the three tunnels that connect the active site of t-PlaF<sub>A</sub>  
148 to its surface like in the crystal structure (Figure 2) [19]: Tunnel 1 (T1) and tunnel 2 (T2)  
149 point towards the membrane, and tunnel 3 (T3) opens to the periplasmic space > 15  
150 Å above the membrane (Figure 2). T1 and T2 converge close to the active site and  
151 connect to T3. In the crystal structure, T1 contains MYR (chain A) and UND (chain B),  
152 which are hydrolysis products of GPL substrates with C14 and C11 acyl chain(s),  
153 respectively.

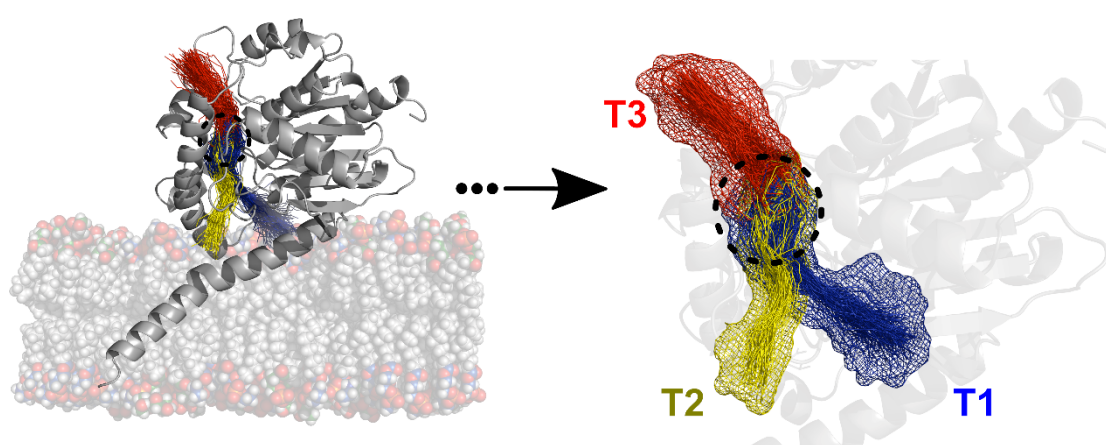

154  
155 **Figure 2: Clusters of tunnels identified in t-PlaF<sub>A</sub> ensembles.** Three major tunnel clusters  
156 connect the catalytic site (black dashed circle) of PlaF to the protein surface. Tunnels T1 and  
157 T2 point towards the membrane; tunnel T3 is located > 15 Å above the membrane, with its  
158 opening pointing into the periplasmic space.

159

160 **Table 1:** Characteristics of tunnel clusters identified from unbiased MD simulations of t-PlaF<sub>A</sub>  
161 using CAVER.

| Tunnel cluster | Occurrence <sup>a,b</sup> | Maximum bottleneck radius <sup>c</sup> | Average bottleneck radius <sup>c</sup> | Average length <sup>c</sup> |
|----------------|---------------------------|----------------------------------------|----------------------------------------|-----------------------------|
| T1             | 30.45                     | 3.18                                   | 2.28                                   | 27.08                       |
| T2             | 21.80                     | 2.95                                   | 2.21                                   | 23.75                       |
| T3             | 27.75                     | 3.13                                   | 2.29                                   | 15.16                       |

162 <sup>a</sup> Snapshots in which the tunnel is identified with respect to the total number of snapshots, in %.

163 <sup>b</sup> Data calculated with a probe radius of 2.0 Å.

164 <sup>c</sup> In Å.

165

166 T1 is the longest tunnel (Table 1) and was open more often than the other two tunnels

167 (Table 1). The tunnel radii fluctuate between 2 Å and 5 Å depending on the location in  
168 the tunnel and the simulation length (Figure S1). The average bottleneck (narrowest  
169 part of the tunnel) radius of all tunnels is  $2.26 \pm 0.02$  Å (mean  $\pm$  standard error of the  
170 mean), which is close to the radius of glycerol (2.74 Å) [27], an essential component  
171 of all GPLs, but smaller than the radius of 1,2-dilauroyl-*sn*-glycero-3-phosphoglycerol  
172 (DLPG) (~4.4 Å) deduced from the lipid's area-per-lipid [28]. For comparison, tunnels  
173 in monomeric PlaF<sub>A</sub>, PlaF<sub>B</sub>, and the two chains of di-PlaF show open occurrences of  
174 ~20% to ~5% (Table S1), indicating no marked differences between monomeric and  
175 di-PlaF.

176 To conclude, the active site of PlaF is connected to its surface with three tunnels. In  
177 the t-PlaF<sub>A</sub> configuration, only T1 and T2 allow direct access of GPL or LGPL  
178 substrates from the membrane.

179

### 180 **PlaF preferentially hydrolyses medium-acyl chain LGPLs**

181 Previously, we showed that PlaF can produce LGPLs by releasing FAs bound to the  
182 *sn*-1 position of GPLs. Here we experimentally tested if purified PlaF *in vitro* hydrolyses  
183 LGPLs by quantifying fatty acids released from a range of LGPLs varying in the head  
184 group and acyl chain length (C14-C18). The results revealed that PlaF can hydrolyze  
185 all tested LGPLs, with a preference for medium-acyl chain LGPLs (Figure 3).  
186 Interestingly, the lysoPLA activity of PlaF was 10- to 100-fold higher for all LGPLs than  
187 its PLA activity [19], indicating that hydrolysis of the first acyl chain in GPLs is much  
188 slower than that of the second one.

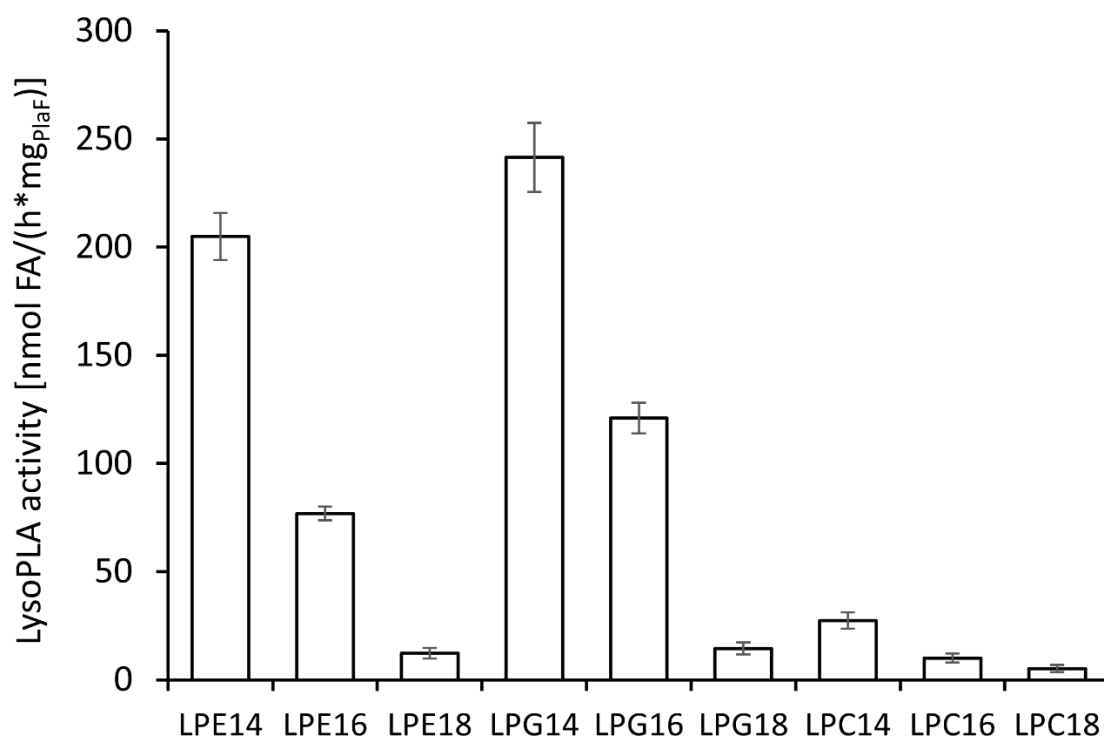

189

190 **Figure 3: Lysophospholipase A activity of PlaF.** Assays were performed by incubating  
191 purified PlaF (8 nmol) in *n*-dodecyl  $\beta$ -D-maltoside (DDM) micelles with the substrate, followed  
192 by quantification of released FA by NEFA-assay. Lyso-phosphatidylethanolamine (LPE), lyso-  
193 phosphatidylglycerol (LPG), and lyso-phosphatidylcholine (LPC) contain fatty acids with 14 - 18  
194 carbon atoms. The results are the means  $\pm$  standard deviation of three independent  
195 experiments.

196

### 197 **GPL and LGPL substrate extraction into solvent and acyl chain mobility**

198 For probing the energetics of GPL and LGPL substrate extraction from the membrane  
199 into the solvent, we computed the free energy profile for DLPG and 1-myristoyl-2-  
200 hydroxy-*sn*-glycero-3-phosphoglycerol (2LMG) extraction (Supplementary results),  
201 which resulted in free energy differences between the two states of  $\sim 13 \pm 0.1$  kcal mol<sup>-1</sup>  
202 and  $\sim 8 \pm 0.3$  kcal mol<sup>-1</sup> (Figure S2A), in very good agreement with the excess chemical  
203 potential related to these lipids' critical micelle concentration (CMC). For access to T3,  
204 substrates would need to leave the membrane and pass through the water phase,  
205 which makes this route energetically unfavorable. Hence, T3 was not considered for  
206 further analyses.



207 As T1 and T2 are immersed in the hydrophilic membrane surface (Figure S3A), access  
208 of GPL and LGPL substrates to the tunnels *via* the head groups is plausible. However,  
209 the tunnels' diameters are much smaller than that of a GPL like DLPG while in the  
210 membrane (see above). To explore the possibility that lipids access via their acyl chain  
211 instead, we probed how frequently the terminus of a GPL's acyl chain can reach the  
212 membrane interface. The probability distribution of GPL's acyl chains with respect to  
213 the coordinate perpendicular to the membrane (z-coordinate) was determined during  
214 the last 40 ns of 300 or 100 ns long MD simulations for membrane bilayers with or  
215 without t-PlaF<sub>A</sub>, respectively (Figure S3A). Tails from both the upper and lower leaflet  
216 were considered. Positive z-coordinate values indicate that a tail moves towards the  
217 water-membrane interface of *its* leaflet; negative values indicate that it moves towards  
218 the interface of the *opposite* leaflet. The peak of the probability distributions is at  
219  $z \approx 2 \text{ \AA}$  indicating the mobility of lipid termini within the leaflet (Figure S3A, see also  
220 Movie S1 and Movie S2). The interface of the simulated membrane is at  $z \approx 10 \text{ \AA}$   
221 (Figure S3B). Notably, the cumulative probability of finding an acyl chain terminus at  
222  $z > 10 \text{ \AA}$  is 1.5 % and 1.0 % for systems with or without PlaF, respectively. Hence,  
223 there is a finite likelihood that acyl chain termini can reach the entrances of T1 and T2.  
224 This result is also supported by the electron density profiles of the membrane  
225 components (Figure S3B).

226 To conclude, for t-PlaF, the access route of substrates to T3 is energetically  
227 unfavorable. By contrast, acyl chain termini of GPL lipids can reach the entrances of  
228 T1 and T2 during the time scales of our MD simulations.

229

### 230 **Access modes of GPL and LGPL substrates into PlaF**

231 As a prerequisite to computing the energetics of substrate access to the active site of  
232 PlaF, we aimed to identify favorable access modes. We applied steered molecular  
233 dynamics (sMD) simulations [29] to pull substrates inside T1 and T2 (Figure 4) *via*  
234 head access first or tail access first.

235 The closest substrate to the tunnel entrance was chosen for sMD simulations. The  
236 terminal oxygen and nitrogen atom of phosphatidylglycerol (PG) or  
237 phosphatidylethanolamine (PE) head groups, respectively, were considered for head  
238 access pulling. For tail access, the terminal carbons of respective acyl chains were  
239 considered. Substrates from the membrane were initially pulled through consecutive  
240 virtual points in T1 or T2 using four or five steps, respectively (Figure S4A, Table S2).  
241 However, pulling with terminal atoms leaves the cleavage site of the substrate distant  
242 to the catalytic S137 (Figure S4B). Therefore, the substrates were further pulled into  
243 T3, using three additional steps (Figure S4A). Depending on the access mode, the *sn*-  
244 1 or *sn*-2 sites of respective substrates were further pulled towards the nucleophilic  
245 OH group of the catalytic S137 (Table S2). Finally, this resulted in pulling pathways  
246 subdivided into eight and nine steps for T1 and T2, respectively (Table S2).

247 As a reaction coordinate, the distance between the pulled atom of a substrate and the  
248 consecutive virtual point was used. For each step, we repeated the pulling 50 times  
249 and computed the work done as a function of the reaction coordinate. By applying  
250 Jarzynski's relation (eq. 1) [30], the work was related to the free energy difference  
251 between the two states of the pulling simulation. The sMD trajectory whose work-  
252 versus-reaction coordinate profile is closest to the Jarzynski average (eq. 1) was  
253 considered most favorable. Its endpoint provided the starting point for the sMD  
254 simulations in the next part of the pulling pathway. As a result, the access pathway is  
255 close to the lowest-free energy pathway of substrate access to the catalytic site.  
256 Overall, this approach is the reversed version of sampling unbinding trajectories of  
257 ligands from proteins before applying Jarzynski's relation [31-33] but uses piecewise  
258 sMD simulations along the pathway to account for the curvilinear tunnels. A total of ~27  
259  $\mu$ s of sMD simulation time was used for either tunnel (Table S3).

260 The activity of PlaF for GPL decreases with the increasing lengths of the acyl chain  
261 between C12 and C18, irrespective of the type of head group, PG or PE [19]. In  
262 addition, the number of acyl chains in a substrate also influences the PlaF activity, with  
263 LGPLs yielding a higher activity than GPLs (Figure 3). Hence, we chose DLPG with

264 which PlaF is most active [19], 1,2-dilauroyl-*sn*-glycero-3-phosphorylethanolamine  
265 (DLPE), 1,2-distearoyl-*sn*-glycero-3-phosphoglycerol (DSPG), and 2LMG, a LGPL, for  
266 generating access modes (Figure 4A). Figure 4 exemplarily shows illustrations of the  
267 three access types for DLPG (see also Movies S3 - S8). Work-versus-reaction  
268 coordinate profiles for all pulling simulations related to DLPG access are shown in  
269 Figure S5 for T1 and Figure S6 for T2. Based on computed potentials of mean force  
270 (PMF) to evaluate the energetics of the access modes (see the next chapter), only tail  
271 access was considered for sMD simulations of the other GPL substrates (Figure S7).  
272 For 2LMG, head and tail access were considered for sMD simulations.

273 To conclude, seven access modes of GPL and two of LGPL substrates into PlaF were  
274 generated for T1 and T2, resulting in 18 access modes in total.

275

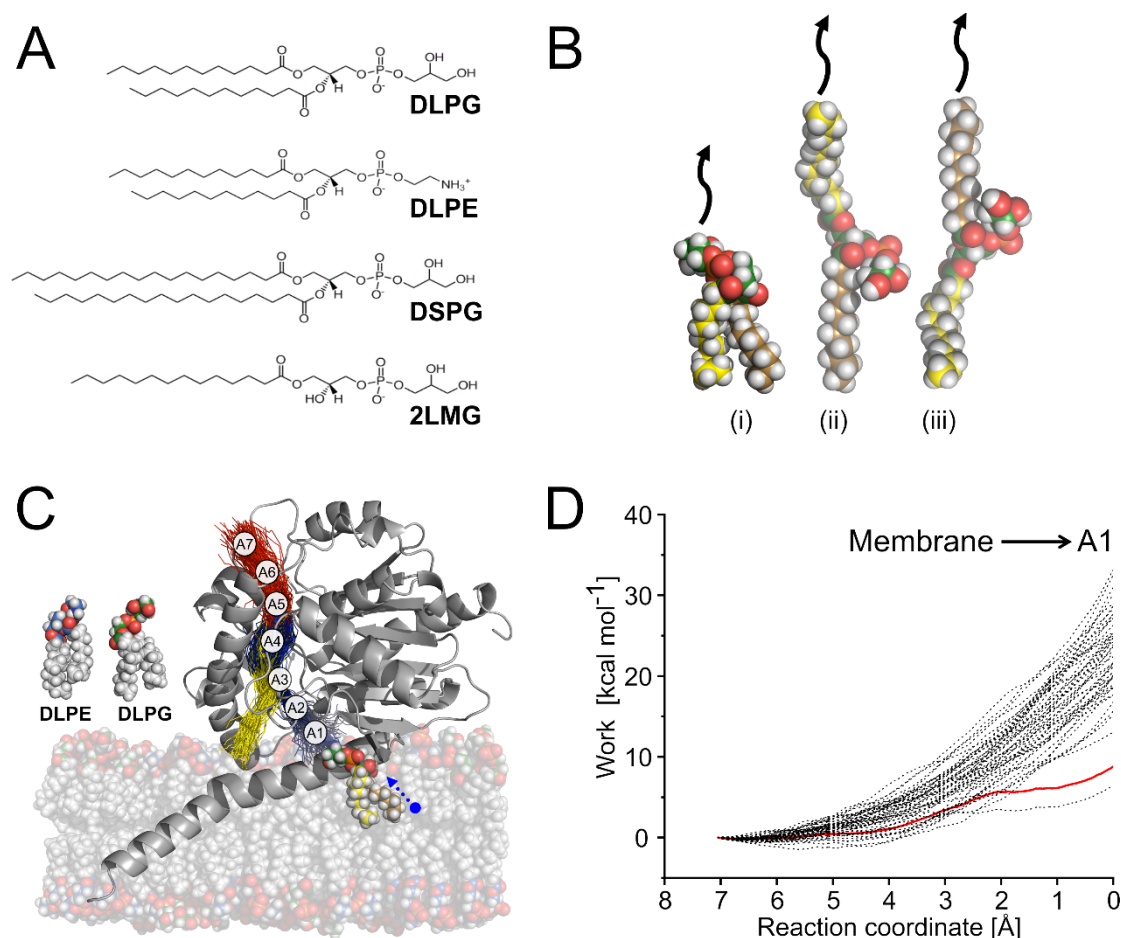

276

277 **Figure 4: Illustration of the substrate access in t-PlaFA.** A) Investigated GPL substrates,

278 1,2-dilauroyl-*sn*-glycero-3-phosphoglycerol (DLPG), 1,2-dilauroyl-*sn*-glycero-3-  
279 phosphorylethanolamine (DLPE), 1,2-distearoyl-*sn*-glycero-3-phosphoglycerol (DSPG), and  
280 LGPL substrate, 1-myristoyl-2-hydroxy-*sn*-glycero-3-phosphoglycerol (2LMG). B) Possible  
281 modes by which a GPL can access a tunnel (indicated with black arrow): with its head (green  
282 spheres represent the C atoms) first (i), tail 1 (yellow spheres represent the C atoms) first (ii),  
283 or tail 2 (orange spheres represent the C atoms) first (iii). C) PlaF is embedded in a membrane  
284 consisting of DLPE (head group C atoms as blue spheres) and DLPG (head group C atoms as  
285 green spheres) at a ratio of 3:1. The DLPG closest to the entrance of T1 (acyl chains colored)  
286 is shown while being loaded by its head, in the direction indicated with a blue arrow. A  
287 segmented path was considered for substrate access. T1 was segmented into four parts, and  
288 T3 into three parts, which are used as pulling points in sMD simulations. Depending on the  
289 access mode, in the last pulling step, the *sn*-1 or *sn*-2 site of the substrate is further pulled  
290 towards the nucleophilic OH group of the catalytic S137, resulting in, in total, 8 steps. A similar  
291 approach was used for T2 (Figure S4A). D) For the first segment of T1 (i.e., A1), the work done  
292 (black lines) during 50 independent replicas of sMD simulations to pull the DLPG from the  
293 membrane is plotted against the reaction coordinate. The coordinates of the replica, the work-  
294 versus-reaction coordinate profile of which is closest to the Jarzynski's average (red line), are  
295 considered for pulling in the next segment. See the SI for plots of all other sMD simulations.

296

## 297 **Potentials of mean force of DLPG access modes**

298 PMFs were computed from umbrella sampling (US) simulations [34] and post-  
299 processing with WHAM [35, 36] to evaluate the energetics of substrate access for the  
300 access modes described in the previous chapter (Figure 4). As a reaction coordinate,  
301 the distance between the center of mass (COM) of the three oxygen atoms of the  
302 glycerol moiety in the substrate to the COM of C $\alpha$  atoms of the catalytic residues S137  
303 and H286 was used. Residue D258 was not included in the reaction coordinate, as its  
304 side chain is distant from the active site (Figure S4A). As the tunnels are almost  
305 straight, the reaction coordinate monotonically decreases as the substrate approaches  
306 the active site from the membrane (Figure S4B). Initially, we focused on the US  
307 simulations for the best PlaF substrate [19], DLPG. PMFs were calculated for the three  
308 access modes of DLPG across either tunnel, T1 and T2. The PMFs were evaluated  
309 for convergence, excluding the first 200 ns of 300 ns sampling time. PMFs were found  
310 converged by 300 ns, yielding a maximal difference of  $\sim 1$  kcal mol $^{-1}$  as to a PMF  
311 computed from 280 ns per window (Figure S8). The median overlap between the

312 reaction coordinate distributions of neighboring windows was sufficient ( $\geq 4.8\%$  and  
313  $3.5\%$  for T1 and T2, respectively) (Figure S9).

314 The PMFs of DLPG access modes show marked differences (Figure 5A). Access with  
315 the head first is the least favorable for both T1 and T2, resulting in steep PMFs with  
316 free energy barriers of 11 and 9 kcal mol<sup>-1</sup> (Figure 5A), in contrast to tail access. Most  
317 of the residues within a radius of 3 Å in T1 and T2 have either a neutral non-polar side  
318 chain, which likely facilitates tail access to the active site of PlaF. Furthermore, access  
319 with either one of the two tails first is more favorable in T2 than T1 (Figure 5A). Finally,  
320 access with tail 1 first in T2 is most favorable and results in no free energy barrier until  
321 the substrate reaches the active site (Figure 5A). As the two acyl chains of DLPG are  
322 identical, these results suggest that their connection with the glycerol moiety causes  
323 differences in how the lipid interacts with the tunnel, which may explain how PlaF  
324 achieves regioselectivity to exert its PLA<sub>1</sub> function.

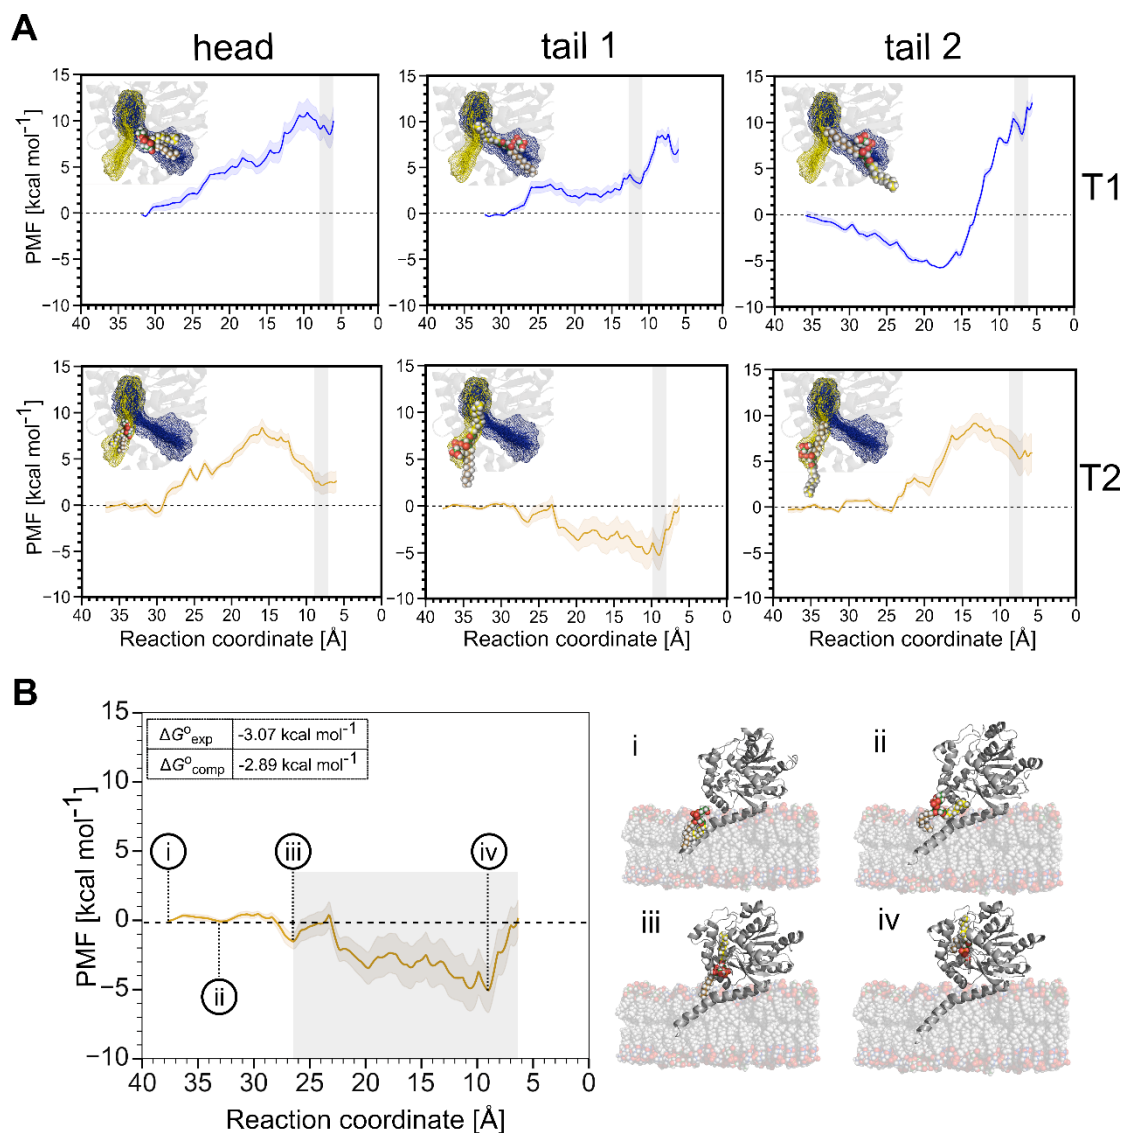

325

326 **Figure 5: Potential of mean force profiles for DLPG access.** (A) PMFs of three access  
 327 modes (head, tail 1, tail 2; see Figure 4B) of DLPG in T1 (blue curve) and T2 (yellow curve).  
 328 For both tunnels, access with tail 1 first yields the lowest free energy barriers to reach the active  
 329 site. Furthermore, DLPG access into T2 with tail 1 first is overall the most favorable. The  
 330 catalytic site is marked with a grey box. Insets within the plots illustrate the different DLPG  
 331 access modes into the respective tunnels. (B) States during DLPG access via tail 1 through T2,  
 332 shown on the right, are marked in the PMF profile (left). The grey box corresponds to the  
 333 integration limits used to calculate  $K_{\text{eq}}$  (eq. 2) to determine  $\Delta G^{\circ}_{\text{comp}}$  (see inset). State i: The  
 334 starting position of DLPG (in the membrane). State ii: Tail 1 reaches the surface of the  
 335 membrane close to the entrance of T2. State iii: Tail 1 enters inside T2, while tail 2 remains  
 336 within the membrane. State iv: *sn-1* site of tail 1 reaches the catalytic site.

337 To validate our results, we computed the absolute binding free energy of DLPG to PlaF  
 338 from the PMF for tail 1 access in T2,  $\Delta G^{\circ}_{\text{comp}} = -2.89 \pm 1.46 \text{ kcal mol}^{-1}$  (eq. 4).  
 339 Assuming that product formation is slower than substrate dissociation from an enzyme,

340 the Michaelis constant  $K_m$  is equal to the dissociation constant  $K_D$  of the enzyme-  
341 substrate complex [37, 38]. Under this assumption, from  $K_m = 7.612 \pm 1.907$  mM for  
342 DLPG in PlaF [39], the experimental binding free energy  $\Delta G_{\text{exp}}^\circ = -3.07 \pm 0.30$  kcal  
343  $\text{mol}^{-1}$  at  $T = 303$  K is calculated, which is within chemical accuracy [40] of  $\Delta G_{\text{comp}}^\circ$ .

344 We also computed  $\Delta G_{\text{comp}}^\circ$  for the other five access modes of DLPG (eq. 4). The  
345 lowest  $\Delta G_{\text{comp}}^\circ$  among all six modes was obtained for tail 2 access in T1 (Table S4).  
346 However, the PMF profile (Figure 5A) reveals that the configurational free energy  
347 minimum is not situated close to the active site but in the middle of T1. Here, one of  
348 the tails is still in the membrane, while the other is being loaded into the tunnel. If the  
349 PMF profile is integrated with two separate parts, first, a negative free energy for tail  
350 access into the tunnel results, followed by a positive free energy to reach the active  
351 site. This suggests that this access mode cannot yield a catalytically active  
352 configuration. For the other four access modes,  $\Delta G_{\text{comp}}^\circ > 0.96$  kcal  $\text{mol}^{-1}$  (Table S4).  
353 These findings corroborate tail 1 access of DLPG in T2 as the most likely access mode.

354 Along the PMF of tail 1 access of DLPG in T2, four distinct states can be identified  
355 (Figure 5B). The two tails of DLPG are immersed in the membrane at a reaction  
356 coordinate value of  $\sim 38$  Å from the active site (Figure 5B, state i). The PMF remains  
357 essentially unchanged if tail 1 approaches the surface of the membrane and the  
358 entrance of T2 (state ii). This is concordant with the tail distributions along the z-  
359 coordinate during unbiased MD simulations (Figure S3), indicating that tail termini can  
360 reach one of the access tunnels of t-PlaF<sub>A</sub> without a considerable energetic cost. Once  
361 tail 1 enters T2, the PMF becomes negative (state iii), indicating that DLPG access  
362 that way is favorable. Finally, at  $\sim 8$  Å of the reaction coordinate, the PMF has a global  
363 minimum (state iv). There, tail 1 is located in T3, and the acyl moiety at the *sn*-1 position  
364 of DLPG is close to the catalytic S137 of PlaF (Figure S10B) such that a nucleophilic  
365 attack can commence.

366 To conclude, we identified T2 as the preferred access tunnel for DLPG in PlaF. Access  
367 with tail 1 first is most favorable there. This is in line with PlaF being a PLA<sub>1</sub>, which

368 cleaves its substrates at the *sn*-1 position. As of T3, it is likely essential for substrate  
369 access by allowing to accommodate the substrate tail to be hydrolyzed by PlaF.

### 370 **Potentials of mean force for accesses of other substrates**

371 Considering the results for DLPG, we performed US simulations for DSPG and DLPE  
372 only for tail 1 access. For the LGPL substrate, it has remained undetermined if the  
373 head or tail access is energetically favorable; hence, we performed US simulations for  
374 both access modes of 2LMG. As for DLPG, T2 is preferred over T1, regardless of the  
375 access modes (Figure 5A), we only considered T2 for computing PMFs for the other  
376 substrates. Similar to DLPG, the PMFs converged at 300 ns of sampling time, yielding  
377 a maximal difference of  $\sim 0.5$  kcal mol<sup>-1</sup> as to a PMF computed from 280 ns per window  
378 (Figure S11). Neighboring umbrella windows have a sufficient median overlap  $\geq 3.2\%$   
379 (Figure S12).

380 For DSPG and DLPE, access with tail 1 first in T2 results in pronounced free energy  
381 barriers of 11 and 14 kcal mol<sup>-1</sup> (Figure 6A, B), in contrast to DLPG (0.5 kcal mol<sup>-1</sup>).  
382 This finding indicates that a longer acyl chain or a neutral head group makes substrate  
383 access to PlaF unfavorable, which coincides with lower PlaF activities for such  
384 substrates [19]. For 2LMG, access with the tail first is more favorable than with the  
385 head, as for DLPG (Figure 6C, D). Furthermore, tail access by 2LMG leads to a free  
386 energy barrier lower by  $\sim 6.5$  kcal mol<sup>-1</sup> than those for tail access by DSPG and DLPE  
387 (Figure 6A, B, D), which is concordant with the activity profile of PlaF [19].



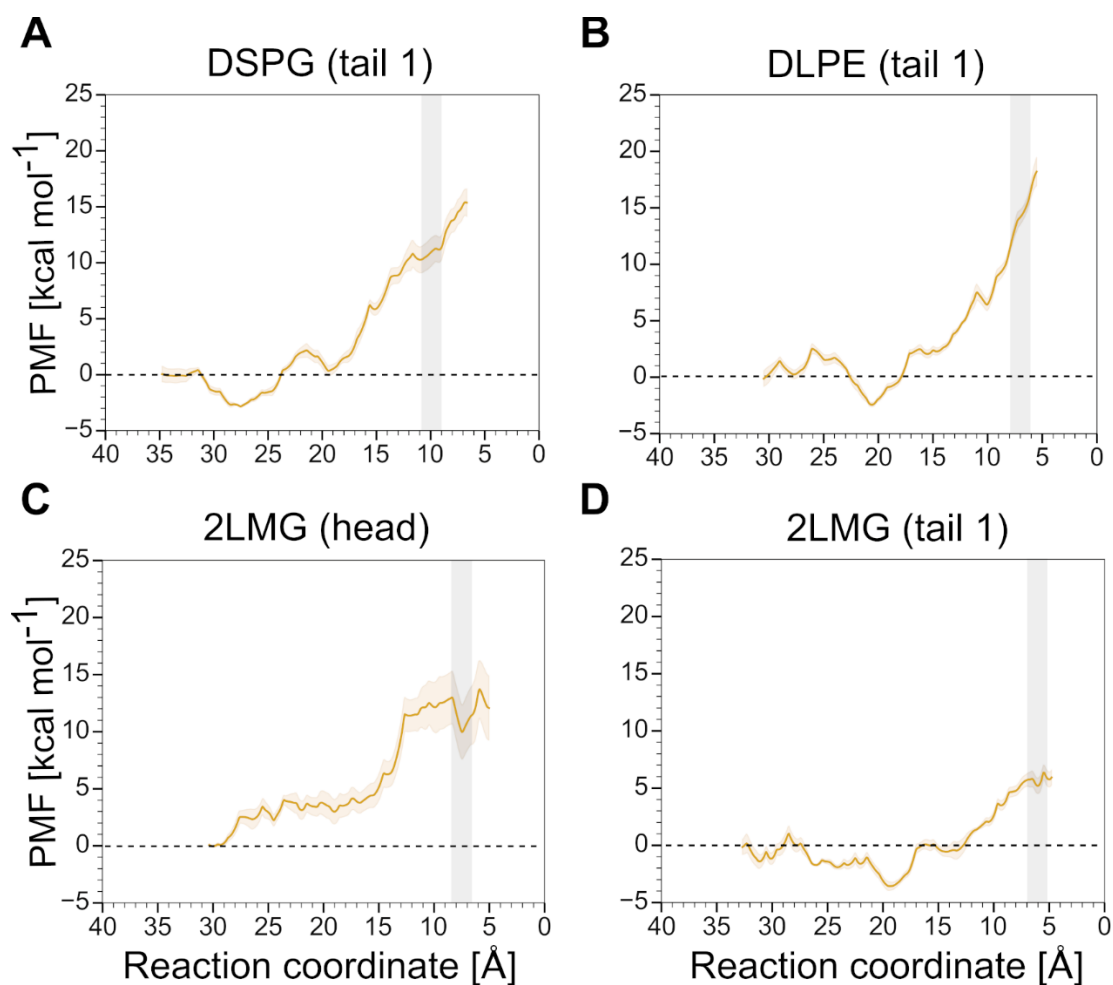

388

389 **Figure 6: PMF profiles for other substrates across T2.** Four systems were investigated to  
390 reveal the energetics of DSPG access via tail 1 (A), DLPE via tail 1 (B), 2LMG via head (C),  
391 and 2LMG via tail 1 (D). Among these substrates, access of 2LMG via tail 1 has the lowest free  
392 energy barrier. The catalytic site is marked with a grey box.

393 To conclude, tail 1 access in T2 of GPL substrates with longer acyl chains or neutral  
394 head groups is disfavorable compared to DLPG access, in line with PlaF's substrate  
395 specificity. For the LGPL substrate 2LMG, tail 1 access is also favored over head  
396 access and more favorable than DSPG and DLPE access.

397

### 398 **Tryptophan substitutions in T2 hamper DLPG access**

399 To validate the prediction that T2 is the preferred access pathway, we identified residue  
400 positions in all identified tunnels that, when substituted with tryptophan (Trp), should  
401 constrict the tunnel and, thus, block substrate access. Earlier, this strategy has been

402 used to block tunnels of a dehalogenase and influence its activity by limiting the rate  
403 of product release [41]. In the case of PlaF, the products are less bulky than the  
404 substrates, such that product release should be less impacted than substrate access  
405 due to constricted tunnels.

406 PlaF variants were predicted subject to minimizing the structural destabilization due to  
407 the Trp substitution and preferring sites within the tunnels that influence its geometric  
408 characteristics (Table S5). We predicted four Trp substitutions for T1 and five for T2,  
409 and T3 each (Table S5). With any one of these substitutions in place, the impacted  
410 tunnel could not be identified anymore by CAVER applying the previously used probe  
411 radius of 2 Å, but with a smaller probe radius of 1.2 Å (Figure 7). This indicates their  
412 constriction, also displayed by the time evolution of the tunnel profiles of the PlaF  
413 variants compared to PlaF wild type (Figure S13).

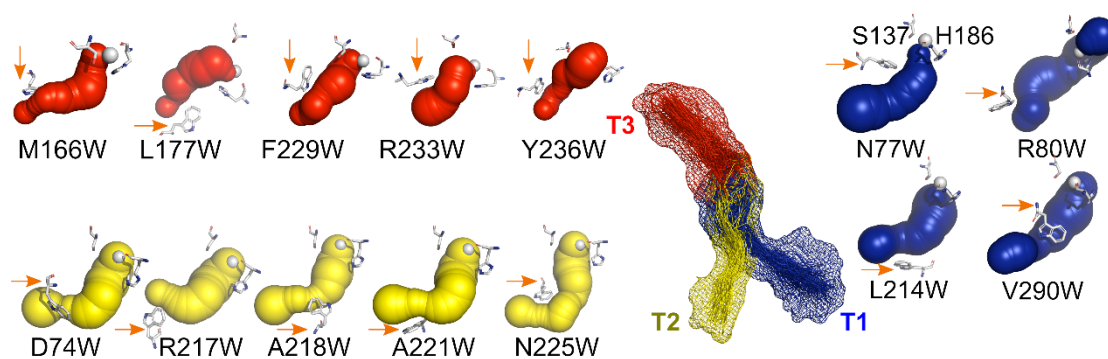

415 **Figure 7: Influence of tryptophan substitutions on the radius of PlaF tunnels.** The tunnels  
416 T1 (blue), T2 (yellow), and T3 (red) are identified by CAVER with a reduced probe radius of  
417 1.2 Å, instead of 2 Å used otherwise (Figure 2), showing that the tryptophan substitutions  
418 (orange arrows) narrow the tunnels. White spheres, wherever visible, represent the origin of  
419 the search defined by the COM of the catalytic residues S137 and H286.

420 The mutations of fourteen suggested residues (Figure 7) to Trp were generated by  
421 sequence- and ligation-independent cloning (SLIC) method in which the whole *p*-PlaF  
422 expression vector was amplified. Mutations were verified by sequencing, and the wild  
423 type PlaF (PlaF<sub>WT</sub>) and respective variants were produced in the homologous host, *P.*  
424 *aeruginosa*, following their immobilized metal affinity chromatographic (IMAC)  
425 purification from membranes solubilized with *n*-dodecyl β-D-maltoside (DDM) (Figure  
426 S14). All variants showed purity comparable to that of PlaF<sub>WT</sub> (Figure S14). The

427 specific activity of PlaF variants and PlaF<sub>WT</sub> was analyzed by measuring the hydrolysis  
 428 of small (*p*-nitrophenyl butyrate, *p*-NPB) and large (DLPG) substrates (Figure 8A). The  
 429 activities of all nine variants in T1 and T3 measured with *p*-NPB and DLPG were similar  
 430 to the activity of PlaF<sub>WT</sub>. In contrast, all five T2 variants had a significantly ( $p < 0.001$ )  
 431 lower activity with *p*-NPB and DLPG than PlaF<sub>WT</sub>.

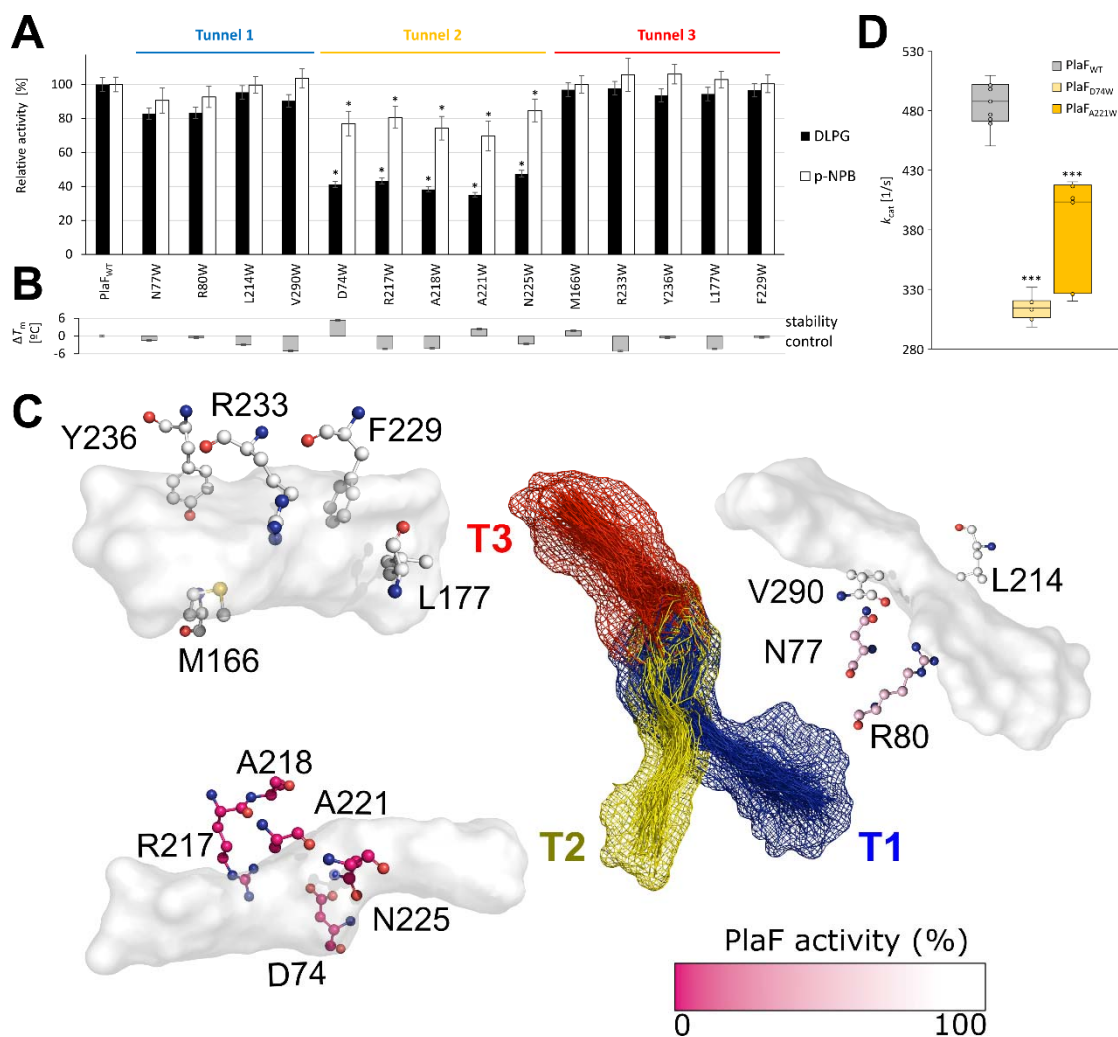

432

433 **Figure 8: Lipolytic activity of PlaF and variants with Trp substitutions in T1-T3.** A) Enzyme  
 434 activities of purified PlaF<sub>WT</sub> and variants carrying respective substitutions measured with DLPG  
 435 and *p*-NPB. Activities are normalized to the activity of PlaF<sub>WT</sub>, which was set as 100%. Results  
 436 are means ± standard deviation of three independent measurements. Statistical analysis was  
 437 performed using the t-test ( $* p < 0.001$ ) of normally distributed values for DLPG ( $n = 8$ ) and *p*-  
 438 NPB ( $n = 9$ ) measurements. B) The thermal stabilities of purified PlaF<sub>WT</sub> and variants were  
 439 measured by nanoDSF. Results are shown as a difference in the melting temperatures ( $\Delta T_m$ )  
 440 of the respective PlaF variant and PlaF<sub>WT</sub>, which was  $57.3 \pm 0.2$  °C. Results are means ±  
 441 standard deviation of three independent measurements, each performed with three samples.  
 442 C) The tunnels, T1 - T3 (mesh view in the center) are represented as white surfaces. The

443 investigated amino acids are shown in ball-and-stick representation. The CPK coloring scheme  
444 was used to color all atoms except carbons, which vary from pink to white (see color scale)  
445 related to the PlaF activity for DLPG after substituting the corresponding residue for a  
446 tryptophan. The PlaF activity is reduced the most if Trp substitutions involve T2. D) Kinetic  
447 parameters of PlaF<sub>WT</sub> and the substrate binding-T2 variants PlaF<sub>D74W</sub> and PlaF<sub>A221W</sub> measured  
448 using *p*-NPB. Kinetic parameters were determined by non-linear regression analysis of the data  
449 ( $n = 9$  for PlaF<sub>WT</sub> and PlaF<sub>A221W</sub>,  $n = 6$  for PlaF<sub>D74W</sub>) fitted to the Michaelis-Menten equation. The  
450 box plots represent the interquartile range between the first and third quartiles of the kinetic  
451 parameters determined for PlaF<sub>WT</sub>, PlaF<sub>D74W</sub>, and PlaF<sub>A221W</sub>. The line inside the box is the  
452 median, and the whiskers represent the lowest and highest values. Statistical analysis was  
453 performed using the t-test (\*\* $p < 10^{-5}$ ).

454 To exclude that a substitution leads to an unstable protein, we measured the thermal  
455 stability of each variant by detecting intrinsic protein fluorescence upon unfolding.  
456 None of the variants showed a drastically reduced stability (Figure 8B). On the other  
457 hand, two T2 variants were slightly more stable (1.8 - 2.4°C) than the PlaF<sub>WT</sub>, and three  
458 variants were slightly less stable (2.7 - 4.3°C). Hence, Trp mutations do not affect  
459 PlaF's stability at the temperature of enzymatic assays (30°C).

460 The observation that PlaF activities with DLPG and *p*-NPB predominantly decreased  
461 with substitutions in T2 (Figure 8A) indicates that substitutions with the bulky Trp  
462 impact passage through T2 (Figure 8C). As expected, the activities with the larger  
463 DLPG decreased more (52 - 65%) than with the smaller *p*-NPB (15 - 30%).

464 We also determined kinetic parameters for the *p*-NPB hydrolysis of PlaF<sub>A221W</sub> and  
465 PlaF<sub>D74W</sub> with substitutions in T2 (Figure S15). Despite a less prominent effect of the  
466 substitutions on specific activities measured with *p*-NPB than DLPG, *p*-NPB allows for  
467 reliable determination of PlaF activities over the range of substrate concentration and,  
468 thus, is applicable for the determination of kinetic parameters of PlaF. In contrast,  
469 enzyme kinetic experiments using hydrophobic DLPG are not feasible because of  
470 micelle formation and the slow rate of reaction.

471 Although, the affinities of PlaF<sub>WT</sub>, PlaF<sub>A221W</sub>, and PlaF<sub>D74W</sub> for *p*-NPB are similar (Figure  
472 S15, also see the table in the inset), the catalytic turnover of both variants (PlaF<sub>A221W</sub>:  
473  $k_{\text{cat}} = 314.6 \pm 7.0 \text{ s}^{-1}$ ; PlaF<sub>D74W</sub>:  $k_{\text{cat}} = 403.4 \pm 15.1 \text{ s}^{-1}$ ) was significantly ( $p < 10^{-5}$ ) lower

474 than of PlaF<sub>WT</sub> ( $k_{\text{cat}} = 487.8 \pm 15.4 \text{ s}^{-1}$ ) (Figure 8D). These results confirm that the point  
475 mutations PlaF<sub>A221W</sub> and PlaF<sub>D74W</sub> interfere with *p*-NPB access through T2.

476 To conclude, biochemical studies of fourteen PlaF variants with Trp substitutions  
477 introduced in all three tunnels showed that only substitutions in T2 reduced lipolytic  
478 activity of PlaF. These results confirm that T2 is the main route for substrate access  
479 from the membrane to the catalytic site.

480

### 481 **Potential egress pathways of PlaF products**

482 Next, we aimed at identifying potential egress pathways for products of PlaF-catalyzed  
483 hydrolysis. We performed a set of unbiased MD simulations starting from a hydrolyzed  
484 2LMG in t-PlaF<sub>A</sub>. The starting coordinates were taken from the last snapshot of the US  
485 simulations of 2LMG with tail 1 access through T2, considering the umbrella window  
486 where the *sn*-1 position of 2LMG was closest to the catalytic site. Then, 2LMG was  
487 cleaved into the respective products without changing their orientation in the tunnels  
488 (Figure 9A). This led to MYR being in T3 at the beginning of the simulations and the  
489 PGR (phosphatidylglycerol from LGPL, 2LMG) moiety pointing towards T2 (Figure 9B).

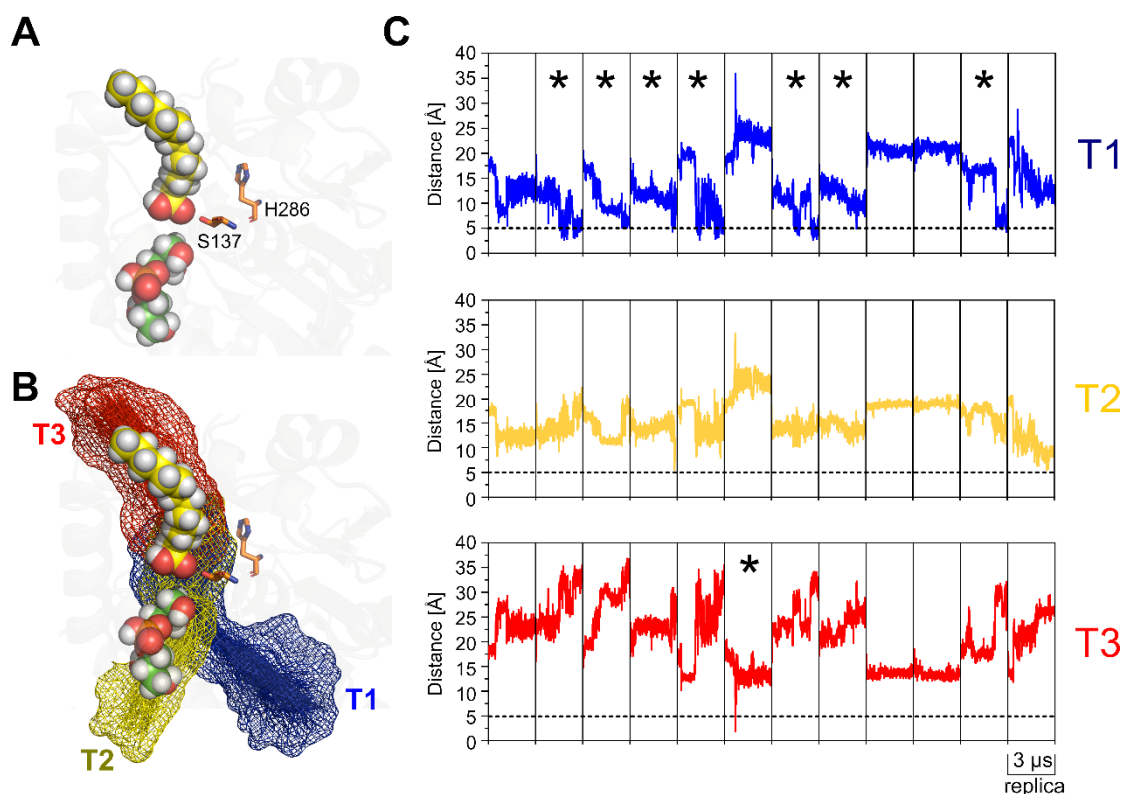

490

491 **Figure 9: Unbiased MD simulations of t-PlaFA with bound hydrolysis products.** (A)  
492 Starting configuration of the 2LMG products in t-PlaFA. MYR is represented with yellow spheres  
493 and PGR with green spheres. The catalytic S137 and H286 are shown as orange sticks. (B)  
494 The products are mapped over the respective tunnels. (C) The distance of MYR to the  
495 entrances of T1-T3 during 12 replicas of unbiased MD simulations of 3  $\mu$ s. The dashed black  
496 line depicts the chosen cutoff of 5 Å, with replicas that reach this cutoff marked with an asterisk.  
497 MYR reaches a distance  $\leq$  5 Å to the entrance of T1 in 7 replicas, in 1 replica for T3, and in  
498 none for T2. Note that in chain A of the PlaF crystal structure, MYR is found in T1.

499

500 In 12 replicas of 3  $\mu$ s length each, the products relocated within the tunnels, sometimes  
501 even diffusing into the solvent (PGR moiety in 2/12 replicas via T1 and 3/12 replicas  
502 via T2; Figure S16). MYR relocated from its original position in T3 and approached the  
503 other tunnels of PlaF during the course of the MD simulations (Figure 9C). To deduce  
504 the displacement of MYR, we measured the distance of the carboxyl carbon to the  
505 entrance of each tunnel. A cutoff of 5 Å, according to previous studies [42-44], was  
506 used to identify those replicas where MYR reaches close to the tunnel entrance. MYR  
507 moved in 7/12 replicas to the entrance of T1 and in 1/12 replicas to the entrance of T3;  
508 the entrance of T2 was not reached (Figure 9C). Interestingly, the instance of MYR  
509 reaching the entrance of T3 flips within T3 such that the carboxyl group points to the

510 entrance, rather than to the active site as after hydrolysis (Figure 9B). Altogether, MYR  
511 reaches the entrance of T1 significantly more frequently than T2 ( $p = 0.0008$ ) and T3  
512 ( $p = 0.0047$ ) (Figure S17, Table S6).

513 To conclude, hydrolysis products of 2LMG diffuse within PlaF during time scales of  
514 3  $\mu$ s, sometimes also between tunnels. T1 and, to a lower extent, T3 are the most likely  
515 egress pathways of FAs from PlaF, although more sampling is required to observe  
516 actual egress.

517

## 518 Discussion

519 Dimer-monomer transitions regulate the activity of several membrane-bound  
520 phospholipases, including PLA<sub>1</sub>, and PLA<sub>2</sub> [45-52]. Previously, we showed that PlaF  
521 becomes active due to a dimer-to-monomer transition followed by tilting of the  
522 monomer in the membrane, resulting in t-PlaF<sub>A</sub> being the active configuration of PlaF  
523 [19]. Here, we addressed the questions of how membrane-bound substrates reach the  
524 active site of PlaF<sub>A</sub> and how the characteristics of the active site tunnels determine the  
525 activity, specificity, and regioselectivity of PlaF for medium-chain substrates. We  
526 performed unbiased and biased MD simulations and showed by configurational free  
527 energy computations and mutational and enzymatic studies for t-PlaF<sub>A</sub> that A) access  
528 of the two main PlaF substrates DLPG and 2LMG occurs most likely through tunnel T2  
529 in a tail-first mode, B) access of substrates with longer acyl chains or neutral head  
530 groups is less favorable, C) tail 1 access of DLPG and 2MLG in T2 is more favorable  
531 than tail 2 access, D) T3 accommodates the substrate tail to be hydrolyzed, and E) T1  
532 and T3 are potential product egress pathways.

533 Previous studies indicated that the characteristics of substrate access tunnels can  
534 have a decisive influence on enzyme-substrate specificity and activity [53-56]. In t-PlaF,  
535 we focused on T1 and T2 because only these two allow direct access of GPL or LGPL  
536 substrates from the membrane in the t-PlaF<sub>A</sub> configuration. By contrast, to enter into  
537 T3, substrates would need to pass through the solvent, which is energetically

538 unfavorable. In di-PlaF, T2 is closest to the membrane with a distance of  $7.4 \pm 1.5 \text{ \AA}$   
539 but T1 and T3 are at a distance  $> 12 \text{ \AA}$  (Figure S18A). Hence, we also investigated  
540 substrate access to T2 in di-PlaF.

541 For assessing the energetics of substrate access, first, we generated 18 pathways,  
542 considering GPL and LGPL as substrates in T1 and T2 using sMD simulations. By  
543 relating the work along the reaction coordinate to the free energy difference between  
544 two states of the pulling simulations via Jarzynski's relation and considering the  
545 endpoint of the sMD trajectory closest to the Jarzynski average as the starting point  
546 for the next sMD simulation, we obtained low-free energy pathways of substrate  
547 access to the catalytic site. sMD simulations have been widely used to explore similar  
548 biological processes such as the loading of GPL substrates into human phospholipase  
549 A<sub>2</sub> (PLA<sub>2</sub>) [57] or recognition of arachidonic acid by cytochrome P450 2E1 across the  
550 access channel [58]. The pathways served for defining reference points for subsequent  
551 US simulations, such that distributions of sampled states sufficiently overlapped, which  
552 is essential to yield accurate results in PMF computations [59]. Applying US along  
553 pathways identified by sMD simulations [60] or targeted simulations [61, 62] has been  
554 shown to be an effective method of computing PMF. Moreover, the choice of an  
555 appropriate reaction coordinate is essential for this approach [63-65]. We probed for  
556 the convergence of our PMFs by comparing PMFs generated from increasing lengths  
557 of US simulations and found that US times of  $\sim 300 \text{ ns}$  are needed to yield PMF  
558 differences below chemical accuracy [66]. Finally, we validated our PMF computations  
559 by comparing the computed absolute binding free energy of DLPG to PlaF for the most  
560 preferred access mode to an estimate of the experimental binding free energy.

561 The PMFs revealed that tail-first access through T2 is most preferred for DLPG and  
562 2LMG. This finding is in line with the geometric analysis of T2, which revealed a tunnel  
563 bottleneck radius about half as large as the radius of DLPG deduced from the lipid's  
564 area-per-lipid, which can explain why a headgroup-first access is disfavorable for steric  
565 reasons. Furthermore, we showed that acyl chains of lipids embedded in a membrane  
566 can reach the interface region in unbiased MD simulations and, thus, can interact with



567 the tunnel entrance. Such protrusions of lipid tails occur on a timescale of  
568 approximately 100 ns depending on the extent of solvent exposure [67]. Tail-first  
569 access of GPLs into the active site has also been found for cyclopropane fatty acid  
570 synthase [68]. Tail-first access through T2 is favored because of the predominant  
571 hydrophobic nature of the tunnel walls. By contrast, T1 contains a higher number of  
572 charged Asp and Arg residues and fewer neutral residues than T2, which makes tail-  
573 first access there less favorable. In particular, the side chain of R80 protrudes into T1  
574 at the tunnel entrance, which is reflected in an energy barrier of  $\sim 3$  kcal mol<sup>-1</sup> found  
575 there for tail-first access.

576 Modifications in tunnels that connect a buried active site to the bulk solvent have been  
577 shown to affect ligand binding and unbinding [41]. Tunnel residues situated away from  
578 the active site are suitable targets for mutagenesis, as their replacement should not  
579 lead to a loss of the functionality of the active site [69]. Considering this, we introduced  
580 Trp substitutions to each of the three tunnels of PlaF and measured the activity of these  
581 PlaF variants. The Trp substitutions decreased PlaF's lipolytic activity for small and  
582 large substrates only when introduced in T2, which suggests that T2 is involved in  
583 substrate access. However, from such steady-state experiments, it cannot be excluded  
584 that the Trp substitutions influence product egress, too [54].

585 Among the investigated substrates, higher energy barriers for access to the active site  
586 were found for those with longer acyl chains and neutral head groups, concordant with  
587 PlaF's activity profile [19]. This finding may be explained with differences in the  
588 energetics of GPL self-assembly, which is influenced by the hydrocarbon chain length  
589 and the polarity of the head group [70]: Longer hydrocarbon chains and less polar head  
590 groups foster self-assembly, which would lead to higher energy barriers for leaving this  
591 equilibrium state [71] and entering into PlaF. These results indicate that the energetics  
592 of access of a membrane GPL substrate to the active site through tunnel T2 contributes  
593 to the substrate specificity of PlaF.

594 Furthermore, of the two constitutopic acyl chains in DLPG, access via tail 1 in T2 is

595 energetically preferred over tail 2 access. If tail 1 enters first, the carbonyl oxy group  
596 at C1 of the glycerol moiety can come closer to the nucleophilic S137 than if tail 2 enters  
597 first, (Figure S10) leading to preferential hydrolysis of the carboxylic ester bond at C1.  
598 Likewise, the regioselectivity of human 5-lipoxygenase is determined by the head/tail-  
599 first type orientation of its main substrate arachidonic acid in the active site [72]: The  
600 arachidonic acid can be positioned in the holoenzyme active site with both head-first  
601 and tail-first orientation, but only the tail-first orientation results in a configuration that  
602 yields 5-lipoxygenating activity. These results indicate that the tail-first access mode of  
603 a diacyl GPL substrate determines the regioselectivity of PlaF for hydrolysis of the acyl  
604 chain bound to the *sn*-1 position.

605 As T3 is oriented to the membrane neither in the monomeric nor in the di-PlaF  
606 configuration, it likely does not contribute to substrate access. We suggest the role of  
607 T3 to accommodate the acyl chain of substrates before and products after hydrolysis.  
608 T3, with a length of ~15 Å, provides adequate space for substrates with medium-  
609 lengths of acyl chains and, thus, may affect the specificity of PlaF. Substrate tunnels  
610 that accommodate acyl chains hydrolyzed from their respective precursors have also  
611 been described for cholesterol acyltransferases [73]. Likewise, lipid phosphate  
612 phosphatases harbor such a cavity, accommodating the substrate's acyl chain for  
613 optimal catalysis [74]. Site-directed mutagenesis in *Candida rugosa* lipase 1 revealed  
614 the role of such tunnels in determining the acyl chain length specificity [75].

615 As to di-PlaF, tail 1 access of DLPG across T2 revealed a free energy barrier of  
616 ~13 kcal mol<sup>-1</sup> (Figure S18B), in contrast to no free energy barrier in t-PlaF<sub>A</sub> (Figure  
617 5B). This high barrier may arise because of the location of T2 in di-PlaF, ~7 Å above  
618 the membrane. Thus, substrates would need to pass through the solvent to enter T2.  
619 These findings indicate that di-PlaF is catalytically inactive, as determined  
620 experimentally [19], because of energetically unfavorable substrate access.

621 Our results from unbiased MD simulations of products suggest that T1 and, to a lower  
622 extent, T3 are egress pathways of FAs. As to T1, this suggestion is in agreement with

623 the crystal structure of PlaF, where FAs are found in T1 [19]. In the tilted orientation of  
624 PlaF, FAs egressing via T1 would interact with the membrane interface and could  
625 diffuse into it. FAs in a membrane can affect its fluidity and permeability and protein-  
626 lipid interactions, thereby regulating important cell processes including signal  
627 transduction, motility, and biofilm formation [76, 77]. Via T3, they would egress into the  
628 periplasmic space. Anchored to the cytoplasmic membrane, PlaF is not a toxin  
629 targeting the host cell membrane but it has a direct influence on virulence adaptation  
630 of *P. aeruginosa* by modulating the membrane GPL composition [19]. However, it is  
631 unknown if FAs released from GPLs by PlaF are targeted to the external environment  
632 as for example diffusible FAs involved in cell-to-cell signaling [17, 18]. In this case,  
633 egress of FAs *via* T3 to the periplasm and their further passive diffusion or active  
634 transport would be possible [78].

635 In summary, we identified T2 as the preferred tunnel for substrate access to t-PlaF<sub>A</sub>,  
636 while T1, and to a lesser extent T3, are likely egress routes for FAs. The energetically  
637 favorable tail 1 access of substrates is in agreement with PlaF's PLA<sub>1</sub> function. The  
638 higher preference of PlaF for GPLs with medium-length acyl chains may be due to  
639 differences in the energetics of self-assembly and the length of T3, which  
640 accommodates them for hydrolysis (Figure 10). Finally, while t-PlaF<sub>A</sub> enables substrate  
641 access to the active site, substrate access to di-PlaF is energetically unfavorable. Our  
642 results provide an atomistic-level understanding of the unique structural feature of PlaF  
643 that its function is dependent on monomerization followed by global reorientation of  
644 the single-pass TM protein at the membrane. They may furthermore aid in  
645 understanding the feedback regulation of PlaF, which is inhibited by FAs, and open up  
646 opportunities for developing potential drugs that inhibit PlaF to combat *P. aeruginosa*  
647 virulence during infections.

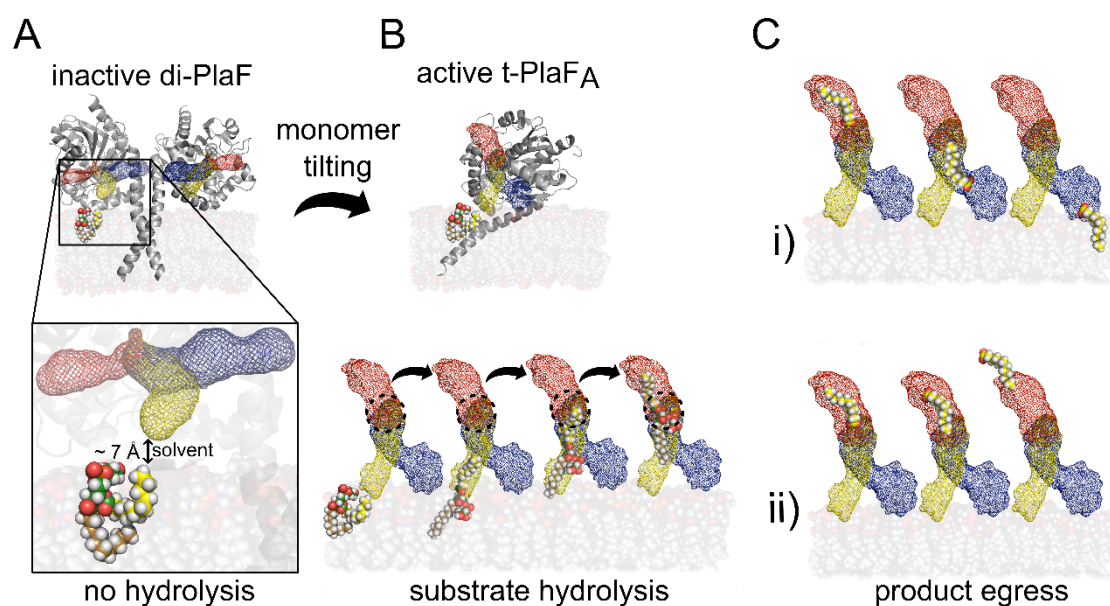

648

649 **Figure 10: Schematic model of the mechanism of PlaF activity regulation.** A) A higher  
650 concentration of PlaF results in the formation of an inactive dimer [19]. In di-PlaF, T2 is closer  
651 to the membrane than the other tunnels, but, still, the distance from the membrane interface is  
652 ~7 Å, which requires the substrate to pass through the solvent. Hence, this configuration leads  
653 to inactive PlaF. B) At low concentrations, monomeric PlaF shows PLA<sub>1</sub> activity and adopts a  
654 tilted configuration [19]. In the tilted configuration, PlaF orients such that T1 and T2 come close  
655 to the membrane interface. Substrate access occurs *via* tail 1 into T2. The acyl chain reaches  
656 the active site (dashed black circle) of PlaF, but the *sn*-1 cleavage site is still away from the  
657 active site. Further loading of the acyl chain requires it to enter into T3, and the substrate is  
658 hydrolyzed. C) After hydrolysis, the FA is in T3. i) Now, either FA relocates into T1, with the  
659 carboxyl group towards the entrance. At the T1 entrance, FA can interact with the membrane  
660 interface and diffuse into it. ii) Alternatively, the FA can flip around, such that the carboxyl group  
661 faces the T3 entrance, from where it can exit into the periplasmic space.

662

## 663 **Materials and methods**

### 664 **Identification of the access tunnels**

665 Tunnels emerging from the active site of PlaF were identified using CAVER 3.0 [26].  
666 The COM of the catalytic residues S137 and H286 was defined as the starting point of  
667 the search, from which the possible connections of the tunnels to the bulk solvent were  
668 identified. The catalytic residue D258 was not included in this search criteria since its  
669 side chain is distant from the catalytic site. Probe and shell radii of 2 Å and 6 Å were  
670 used, respectively. The probe radius of 2 Å is slightly larger than the van der Waals

671 radius of a phosphorous atom (i.e., 1.8 Å), present in every PlaF substrate to be  
672 investigated.

### 673 **Starting structure preparation**

674 The crystal structure of PlaF is available from the Protein Data Bank (PDB) [79] (PDB  
675 id: 6I8W) [19]. The first five residues of the C-terminus were missing in the structure  
676 and, hence, were added using MODELLER [81]. The starting configuration of PlaF for  
677 MD simulations was prepared by embedding t-PlaF<sub>A</sub> into a lipid bilayer membrane  
678 consisting of 75% DLPE and 25% DLPG. The tilted configuration of PlaF embedded in  
679 the membrane was predicted by the Positioning of Proteins in Membrane (PPM)  
680 method [82]. The head group composition of the membrane closely resembles that of  
681 the inner membrane of Gram-negative bacteria [8, 83, 84]. The prepared structure was  
682 used to investigate the loading mechanism of DLPG or DLPE into t-PlaF<sub>A</sub>. Furthermore,  
683 loading of DSPG and an LGPL, 2LMG, were also investigated. For that, t-PlaF<sub>A</sub> was  
684 embedded into a membrane consisting of ~10% of DSPG and 2LMG in the upper  
685 leaflet. The GPL composition in the lower leaflet of these systems is the same as that  
686 used for investigating DLPG and DLPE. The systems were prepared and solvated  
687 using CHARMM/GUI [85] or PACKMOL-Memgen [86]. A distance of at least 15 Å  
688 between the protein or membrane and the solvent box boundaries was used. To obtain  
689 a neutral system, counter ions were added that replaced solvent molecules. The size  
690 of the resulting systems was ~140,000 atoms.

691 Systems excluding the t-PlaF<sub>A</sub>, but including one of the GPL substrates (i.e., DLPG)  
692 and one of the LGPL substrates (i.e., 2LMG), were also prepared to compare and  
693 decipher the energetics of lipid extraction from the membrane into solvent. Considering  
694 the orientation and position of t-PlaF<sub>A</sub> in the membrane, one can safely assume that  
695 only substrates located in one leaflet will contact the catalytic domain of t-PlaF<sub>A</sub> and,  
696 hence, have direct access. Therefore, the composition of one leaflet was slightly  
697 modified to reflect the inclusion of the selected substrate. For this, a ratio in the upper  
698 leaflet of 6:2:1 for DLPE, DLPG, and the respective substrate was used. Using  
699 PACKMOL-Memgen, the bilayer system was prepared, solvated, and necessary

700 counter ions were added. The minimum water distance from the membrane surface to  
701 the solvent box boundaries was increased to 35 Å to leave enough space between the  
702 substrate and the membrane surface and avoid interactions with periodic images  
703 during the extraction. Box dimensions in the x and y axes were set to 70 Å, resulting  
704 in systems comprised of ~50,000 atoms.

### 705 **Simulated extraction of substrates from the membrane**

706 MD simulations were performed using the GPU implementation of the AMBER 16  
707 molecular simulation package [87, 88], employing the ff14SB force field for the protein  
708 [89], the Lipid17 force field for the lipids [90-92], and the TIP3P water model [93]. The  
709 SHAKE algorithm [94] was used to constrain bond lengths of hydrogen atoms to heavy  
710 atoms, enabling a time step of 2 fs. Long-range electrostatic interactions were  
711 considered using the Particle Mesh Ewald (PME) algorithm [95]. The system was  
712 energy-minimized by three mixed steepest descent/conjugate gradient calculations  
713 with a maximum of 20,000 steps each. First, the initial positions of the protein and  
714 membrane were restrained, followed by a calculation with restraints on the protein  
715 atoms only, and finalizing with a minimization without restraints. The minimized system  
716 was then gradually thermalized in two stages. Initially, the temperature was increased  
717 from 0 K to 100 K under NVT conditions, then from 100 K to 300 K under NPT  
718 conditions at 1 bar, using a Langevin thermostat [96]. The equilibration process  
719 continued for 5 ns, before starting with production simulations. As usual in membrane  
720 MD simulations, the NPT ensemble was used, allowing the membrane to  
721 accommodate along the trajectory [97]. For US simulations, the pressure was  
722 maintained using an anisotropic Berendsen barostat [98], while for the rest of the  
723 simulations a semi-isotropic Berendsen barostat [98] was used, coupling the  
724 membrane (x-y) plane with the constant-surface-tension dynamics. All analyses were  
725 performed by using CPPTRAJ [99]. Unless otherwise stated, molecular visualization  
726 was performed with Pymol [100] and VMD [101]. The Movie maker module within VMD  
727 was used to illustrate the acyl chain mobility and the access of substrates into PlaF.

728 To extract a substrate molecule from the membrane into one of the access tunnels, we

729 selected the lipid that was closest to the entrance and pulled it from the membrane  
730 through the tunnel to the active site of PlaF, using constant velocity sMD simulations.  
731 Pulling simulations at low velocities are recommended for small polar molecules [102]  
732 and large lipids [103] to calculate free energy profiles. At the lowest pulling rates, lipids  
733 have time to adapt to energetically favorable conformations during the extraction  
734 process [103]. In a recent study investigating GPL binding to phospholipase A2 (PLA<sub>2</sub>),  
735 a constant pulling velocity of 5 Å ns<sup>-1</sup> was used [57]. For the extraction of substrates,  
736 we considered all three possibilities by which a substrate may enter a tunnel: either  
737 the head group or one of the two tails. Depending on the type of head group (i.e., PG  
738 or PE), each substrate was pulled by its oxygen or nitrogen atoms at a constant velocity  
739 of 1 Å ns<sup>-1</sup> using a force constant of 5 kcal mol<sup>-1</sup> Å<sup>-2</sup>. When pulling at the tail, the terminal  
740 carbon atom of the respective acyl chain was used.

741 Each tunnel was divided into several segments connected through virtual points  
742 formed by the COM of amino acids lining the respective tunnel. The number of virtual  
743 points depends on the length and shape of the respective tunnel. The virtual points  
744 guided the extraction of substrates such that the substrates followed the path of the  
745 respective tunnel. In addition, to obtain a low energy pathway, an adaptive sMD  
746 protocol was implemented. For this, 50 replicas for each pulling simulation were carried  
747 out, and the work required was computed as a function of the reaction coordinate. The  
748 computed work was further related to free energy difference between two states of the  
749 pulling simulation applying Jarzynski's relation (eq. 1) [30].

$$750 \quad e^{-\Delta F/kT} = \overline{e^{-W/kT}} \quad (\text{Equation 1})$$

751 Here,  $\Delta F$  is the free energy difference between two states, which is connected to work  
752  $W$  done on the system [30].  $k$  is the Boltzmann constant and  $T$  the temperature of the  
753 system. The replica closest to the Jarzynski's average [30] was considered to describe  
754 the lowest-free-energy pathway and provided the starting point for the next pulling  
755 stage. Trajectories further away from that pathway were removed. This procedure  
756 results in faster convergence of PMF profiles, decreasing the overall computation  
757 needed [31].

758 For the systems without t-PlaF<sub>A</sub>, the substrates were extracted with the same pulling  
759 velocity and spring constant, as mentioned above. However, to avoid edge effects, a  
760 substrate in the middle of the membrane was located. For this extraction process, the  
761 reaction coordinate was the distance between the head atom of the pulled substrate  
762 and COM of phosphorous atoms of the lipids in the opposite leaflet. Furthermore, to  
763 determine the free energy minimum of the phospholipids in the membrane more  
764 accurately, the substrate was first pulled into the membrane (~3 Å), before pulling it  
765 out of the membrane.

### 766 **Umbrella sampling and potential of mean force calculations**

767 To understand the substrate access mechanism in PlaF and to identify preferential  
768 substrate access tunnels, PMFs were computed based on US [34], taking structures  
769 from the sMD simulations as starting points. As a reaction coordinate, the COM  
770 distance of the three oxygen atoms of the glycerol moiety in the substrate to the COM  
771 of residues S137 and H286 (only C $\alpha$  atoms) of the active site was used. This reaction  
772 coordinate was also taken for over all other systems for it describes the essential  
773 aspects of the structural transformation during substrate access. Consecutive  
774 positions of the substrates from the membrane to the active site as determined by  
775 pulling simulations were considered reference points for US, with each position  
776 corresponding to one umbrella window. To achieve sufficient overlap between the  
777 umbrella windows, distances between reference points of ~1 Å were used along the  
778 reaction coordinate. The length of individual tunnels and the size of acyl chains for  
779 respective substrates vary. Therefore, for sampling the access of different substrates,  
780 different numbers of windows were required for each tunnel. Selected positions of the  
781 lipid in the tunnel were restrained by harmonic potentials, using a force constant of 5  
782 kcal mol<sup>-1</sup> Å<sup>-2</sup>. To achieve sufficient convergence of the PMF profile, each window was  
783 sampled for 300 ns, of which the last 100 ns were used to calculate the PMF. Distance  
784 values were recorded every 2 ps and processed with WHAM [35, 36]. To estimate the  
785 PMF error, the data was separated into blocks according to the maximum calculated  
786 autocorrelation time of 20 ns. The correlation time was obtained for the complete



787 trajectory, excluding the first 20 ns of sampling data for equilibration. The last 100 ns  
788 of sampling data was split into five blocks of 20 ns each, a PMF profile was calculated  
789 for each block with WHAM, and the error at each PMF point was calculated as the  
790 standard error of the mean.

791 Similarly, for systems without t-PlaF<sub>A</sub>, trajectories obtained by pulling simulations were  
792 used to set up US simulations. Umbrella windows were extracted at distances of 1 Å  
793 from the starting point of the pulling simulation until the substrate was not interacting  
794 with the membrane anymore. The selected positions of the lipid were restrained by  
795 harmonic potentials, using a force constant of 5 kcal mol<sup>-1</sup> Å<sup>-2</sup> and as the reaction  
796 coordinate the distance of the COM of the three oxygen atoms of the glycerol moiety  
797 of the substrate to the COM of phosphorous atoms of the lower membrane leaflet.  
798 Each window was simulated for 100 ns at constant pressure (1 bar) and temperature  
799 (300 K) conditions until convergence was achieved. The first 20 ns of simulation data  
800 was discarded. WHAM [35, 36] was used to calculate the PMF. The PMFs were  
801 evaluated for convergence by checking the change in the free energy profile with the  
802 increase in sampling time at every 10 ns. Furthermore, histograms of sampled  
803 configurations were visually inspected for sufficient overlap between the neighboring  
804 umbrella windows; otherwise, the iterative cycle in WHAM fails to converge and the  
805 free energy profiles have discontinuities.

### 806 **Absolute binding free energy from computed PMF**

807 The absolute binding free energy of substrates to PlaF was determined from the  
808 computed PMF using an approach modified from Chen and Kuyucak [104]. The PMF  
809 was integrated along the reaction coordinate (eq. 2) to calculate an association  
810 (equilibrium) constant ( $K_{eq}$ ).

$$811 \quad K_{eq} = \pi r^2 \int_{active\_site}^{membrane} e^{-W(\xi)/kT} d\xi \quad (\text{Equation 2})$$

812 Here,  $r$  is the maximum bottleneck radius of the respective tunnel, which was  
813 determined by a CAVER analysis (Table 1),  $\pi r^2$  is the cross-sectional area of the tunnel,  
814  $W(\xi)$  is the PMF at a specific value of the reaction coordinate,  $k$  is the Boltzmann

815 constant, and  $T$  is the temperature at which the simulations were performed.

816  $K_{eq}$  was then transformed to the mole fraction scale ( $K_x$ ), taking into account the  
817 number of lipids ( $N_L$ ) per surface area  $A$  (eq. 3).

$$818 \quad K_x = K_{eq} \frac{N_L}{A} \quad (\text{Equation 3})$$

819 From  $K_x$ , the difference in the free energy (eq. 4) between the bound and unbound  
820 state ( $\Delta G_b^\circ$ ) of a single substrate molecule was calculated.

$$821 \quad \Delta G_{comp}^\circ = -RT \ln(K_x) \quad (\text{Equation 4})$$

### 822 **Blocking access of the PlaF substrates**

823 To corroborate predicted access tunnels for PlaF substrates, we intended to block  
824 these by small-to-tryptophan substitutions of tunnel-lining residues. To do so, we  
825 identified possible substitution sites from our previous CAVER analyses, taking into  
826 account the tunnels' bottleneck radii and lengths. For these analyses, the same  
827 trajectory used to search for tunnels in t-PlaF<sub>A</sub> was considered. Finally, 4-5 amino acids  
828 within each tunnel were selected for substitutions.

829 In the first step, all the amino acids except glycines and prolines within 3 Å of individual  
830 tunnels and oriented towards a tunnel were considered. In turn, residues with an  
831 outward orientation were disregarded as a substitution there will likely not block the  
832 tunnel. Furthermore, as the TM and JM helix was found to be important for both the  
833 dimerization and the activity of PlaF [19], residues of these helices were excluded.  
834 Finally, the catalytic residues S137, D258, and H286 and other residues of the active  
835 site were disregarded to avoid affecting the activity of PlaF.

836 The selected residues of each tunnel were substituted to tryptophan using FoldX [105],  
837 and the stability of the Plaf variants was evaluated in terms of the change in free energy  
838 ( $\Delta\Delta G$ ) with respect to the wild type [106]. Single amino acid substitutions were  
839 performed 10 times for each proposed residue of each tunnel, and the results were  
840 averaged. If the average  $\Delta\Delta G > 3$  kcal mol<sup>-1</sup>, the substitution is considered  
841 destabilizing [107] and was not further pursued. To check if the proposed substitutions

842 will block the tunnel, the bottleneck radius of the variant tunnels was recalculated using  
843 CAVER. As done earlier, the probe radius was set to 2 Å. If no tunnel was identified  
844 with this criterium, the probe radius for tunnel search was reduced until the tunnels  
845 started to appear again.

## 846 **Biological evaluation of PlaF activity from mutations**

### 847 **a) Site-directed mutagenesis, protein expression, and purification**

848 The plasmids for expression of PlaF variants with substitutions in the tunnels (Table  
849 S5) were created by PCR, using Phusion DNA polymerase (Thermo Fischer Scientific)  
850 in whole plasmid amplification, with mutagenic oligonucleotides (Table S7) designed  
851 for the SLIC method [108], and *p-plaF* plasmid [19] as a template. The presence of  
852 desired nucleotide substitutions was confirmed by DNA sequencing (MWG Biotech,  
853 Ebersberg, Germany). PlaF was purified from *P. aeruginosa p-plaF* membranes and  
854 solubilized with DDM, as described previously [109]. Proteins were analyzed by  
855 polyacrylamide gel electrophoresis under denaturation conditions (SDS-PAGE) on 14%  
856 (w/v) gels, as described by Laemmli [110]. The protein concentration was determined  
857 by measuring the  $A_{280\text{nm}}$  using a NanoDrop 2000C spectrophotometer (Thermo Fisher  
858 Scientific Inc., Waltham, Massachusetts, USA). The extinction coefficients for PlaF and  
859 the variants were calculated with the ProtParam tool (Navia-Paldanius *et al.*, 2012),  
860 considering the amino acid exchange and a His<sub>6</sub>-tag.

### 861 **b) Enzyme activity assays and kinetic studies**

862 The esterase activities of PlaF and variants were determined with *p*-NPB as substrate  
863 as described previously [111], using a 96-well microplate and starting the reaction by  
864 adding 100 µl of PlaF sample (16 nM) to the 100 µl of *p*-NPB solution (2 mM). Kinetic  
865 parameters ( $K_m$  and  $k_{\text{cat}}$ ) for hydrolysis of *p*-NPB were determined using 8 nM enzyme  
866 as described previously [109]. Kinetic parameters were determined by non-linear  
867 regression analysis of data fitted to the Michaelis-Menten equation with PrismLab.  
868 Enzyme activities with DLPG and LGPLs were determined according to the  
869 established protocol in ref. [112]. For enzymatic reactions, 25 µL of PlaF or the variant  
870 (16 nM) and 25 µL of DLPG solution were used. The amount of released FAs after 24 h

871 of reaction were calculated from the calibration curve using oleic acid at concentrations  
872 ranging from 0.1 to 1.0 mM.

### 873 **c) Thermal stability**

874 PlaF and variants (28.1  $\mu$ M, 10  $\mu$ L) loaded into the measuring capillaries (Prometheus  
875 NT.Plex nanoDSF Grade Standard Capillary Chips) were heated from 20 to 90  $^{\circ}$ C  
876 (1  $^{\circ}$ C  $\text{min}^{-1}$  heating rate), and the intrinsic protein fluorescence was recorded at 330 nm  
877 and 350 nm using the Prometheus NT.Plex nanoDSF device (Nano Temper, Munich,  
878 Germany) [113]. The melting points were calculated from the first derivative of the ratio  
879 of  $F_{350\text{nm}}$  and  $F_{330\text{nm}}$  using the PR.ThermControl software (Nano Temper, Munich,  
880 Germany) [113].

### 881 **Egress of PlaF products**

882 To determine the egress pathways of PlaF products, a system with 2LMG substrate  
883 was considered. The final snapshot at 300 ns of the US simulations of the window with  
884 the substrate close to the active site was considered as the starting structure for  
885 unbiased MD simulations. 2LMG was cleaved into the products: MYR and PGR,  
886 without altering the orientation of each product within the tunnels. Atomic partial  
887 charges for the products were derived according to the restraint electrostatic potential  
888 fit (RESP) procedure [114], as implemented in Antechamber [115]. Geometry  
889 optimizations and subsequent single-point calculations were performed with Gaussian  
890 [116] at the Hartree-Fock (HF) level with the 6-31G\* basis set. Force field parameters  
891 for the products were taken from the general amber force field for organic molecules  
892 (GAFF, version 2) [117]. The prepared system was then minimized, thermalized, and  
893 equilibrated using the protocol described above for MD simulations. 12 replicas of  
894 production MD simulations of 3  $\mu$ s length each under NPT conditions were performed.  
895 The distance of the 2LMG products to the entrance of each tunnel was computed for  
896 each replica.

897

## 898 **Acknowledgments**

899 This study was funded by the Deutsche Forschungsgemeinschaft (DFG, German  
900 Research Foundation) project no. 267205415 / CRC 1208 grant to FK and KEJ (TP  
901 02) as well as HG (TP 03). We are grateful for computational support by the “Zentrum  
902 für Informations und Medientechnologie” at the Heinrich-Heine-Universität Düsseldorf  
903 and the computing time provided by the John von Neumann Institute for Computing  
904 (NIC) to HG on the supercomputer JUWELS at Jülich Supercomputing Centre (JSC)  
905 (user IDs: HDD18; plaf).

906

## 907 **Author contributions**

908 H.G. conceptualization, supervision, analysis, visualization, writing; F.K.  
909 conceptualization, supervision, analysis, visualization, writing; K.-E.J. supervision,  
910 writing; S.A. investigation, analysis, visualization, writing; C.H.S. investigation,  
911 analysis, visualization, writing; S.N.S.V. analysis, visualization, writing.

912

## 913 **Competing interests**

914 The authors declare no competing interests.

915

## 916 **Additional information**

917 Supplementary information is available for this paper.

## 918 **References**

- 919 1. Chahtane, H., Nogueira Fuller, T., Allard, P. M., Marcourt, L., Ferreira Queiroz, E.,  
920 Shanmugabalaji, V., Falquet, J., Wolfender, J. L. & Lopez-Molina, L. (2018) The plant pathogen  
921 *Pseudomonas aeruginosa* triggers a DELLA-dependent seed germination arrest in  
922 *Arabidopsis*, *eLife* **7**, 1-34.
- 923 2. Tacconelli, E., Carrara, E., Savoldi, A., Harbarth, S., Mendelson, M., Monnet, D. L., Pulcini,  
924 C., Kahlmeter, G., Kluytmans, J., Carmeli, Y., Ouellette, M., Outtersson, K., Patel, J., Cavaleri,  
925 M., Cox, E. M., Houchens, C. R., Grayson, M. L., Hansen, P., Singh, N., Theuretzbacher, U.,  
926 Magrini, N. & Group, W. H. O. P. P. L. W. (2018) Discovery, research, and development of new  
927 antibiotics: the WHO priority list of antibiotic-resistant bacteria and tuberculosis, *Lancet Infect*  
928 *Dis.* **18**, 318-327.
- 929 3. Gellatly, S. L. & Hancock, R. E. W. (2013) *Pseudomonas aeruginosa*: new insights into  
930 pathogenesis and host defenses, *Pathog Dis.* **67**, 159-173.
- 931 4. da Mata Madeira, P. V., Zouhir, S., Basso, P., Neves, D., Laubier, A., Salacha, R., Bleves,  
932 S., Faudry, E., Contreras-Martel, C. & Dessen, A. (2016) Structural Basis of Lipid Targeting  
933 and Destruction by the Type V Secretion System of *Pseudomonas aeruginosa*, *J Mol Biol.* **428**,  
934 1790-803.
- 935 5. Salacha, R., Kovacic, F., Brochier-Armanet, C., Wilhelm, S., Tommassen, J., Filloux, A.,  
936 Voulhoux, R. & Bleves, S. (2010) The *Pseudomonas aeruginosa* patatin-like protein PlpD is the  
937 archetype of a novel Type V secretion system, *Environ Microbiol.* **12**, 1498-512.
- 938 6. Fozo, E. M. & Rucks, E. A. (2016) The Making and Taking of Lipids: The Role of Bacterial  
939 Lipid Synthesis and the Harnessing of Host Lipids in Bacterial Pathogenesis, *Adv Microb*  
940 *Physiol.* **69**, 51-155.
- 941 7. Housley, N. A., Winkler, H. H. & Audia, J. P. (2011) The *Rickettsia prowazekii* ExoU  
942 homologue possesses phospholipase A1 (PLA1), PLA2, and lyso-PLA2 activities and can  
943 function in the absence of any eukaryotic cofactors in vitro, *J Bacteriol.* **193**, 4634-42.
- 944 8. Dowhan, W. (1997) Molecular basis for membrane phospholipid diversity: why are there so  
945 many lipids?, *Annu Rev Biochem.* **66**, 199-232.
- 946 9. Tannaes, T., Bukholm, I. K. & Bukholm, G. (2005) High relative content of  
947 lysophospholipids of *Helicobacter pylori* mediates increased risk for ulcer disease, *FEMS*  
948 *Immunol Med Microbiol.* **44**, 17-23.
- 949 10. Zheng, L., Lin, Y., Lu, S., Zhang, J. & Bogdanov, M. (2017) Biogenesis, transport and  
950 remodeling of lysophospholipids in Gram-negative bacteria, *Biochim Biophys Acta Mol Cell Biol*  
951 *Lipids.* **1862**, 1404-1413.

- 952 11. Corradi, V., Sejdiu, B. I., Mesa-Galoso, H., Abdizadeh, H., Noskov, S. Y., Marrink, S. J.  
953 & Tieleman, D. P. (2019) Emerging Diversity in Lipid-Protein Interactions, *Chem Rev.* **119**,  
954 5775-5848.
- 955 12. Koehler, J., Sulistijo, E. S., Sakakura, M., Kim, H. J., Ellis, C. D. & Sanders, C. R. (2010)  
956 Lysophospholipid micelles sustain the stability and catalytic activity of diacylglycerol kinase in  
957 the absence of lipids, *Biochemistry* **49**, 7089-99.
- 958 13. Nomura, T., Cranfield, C. G., Deplazes, E., Owen, D. M., Macmillan, A., Battle, A. R.,  
959 Constantine, M., Sokabe, M. & Martinac, B. (2012) Differential effects of lipids and lyso-lipids  
960 on the mechanosensitivity of the mechanosensitive channels MscL and MscS, *Proc Natl Acad*  
961 *Sci U S A* **109**, 8770-5.
- 962 14. Le Senechal, C., Crouzet, M., Costaglioli, P., Barthe, C., Bure, C. & Vilain, S. (2019)  
963 Phospholipid Content of *Pseudomonas aeruginosa* PAO1 Is Modulated by the Growth Phase  
964 Rather Than the Immobilization State, *Lipids* **54**, 519-529.
- 965 15. Benamara, H., Rihouey, C., Abbes, I., Ben Mlouka, M. A., Hardouin, J., Jouenne, T. &  
966 Alexandre, S. (2014) Characterization of membrane lipidome changes in *Pseudomonas*  
967 *aeruginosa* during biofilm growth on glass wool, *PLoS One.* **9**, e108478.
- 968 16. Zhou, L., Zhang, L. H., Camara, M. & He, Y. W. (2017) The DSF Family of Quorum  
969 Sensing Signals: Diversity, Biosynthesis, and Turnover, *Trends Microbiol.* **25**, 293-303.
- 970 17. Twomey, K. B., O'Connell, O. J., McCarthy, Y., Dow, J. M., O'Toole, G. A., Plant, B. J. &  
971 Ryan, R. P. (2012) Bacterial cis-2-unsaturated fatty acids found in the cystic fibrosis airway  
972 modulate virulence and persistence of *Pseudomonas aeruginosa*, *Isme J.* **6**, 939-950.
- 973 18. Ryan, R. P., Fouhy, Y., Garcia, B. F., Watt, S. A., Niehaus, K., Yang, L., Tolker-Nielsen,  
974 T. & Dow, J. M. (2008) Interspecies signalling via the *Stenotrophomonas maltophilia* diffusible  
975 signal factor influences biofilm formation and polymyxin tolerance in *Pseudomonas aeruginosa*,  
976 *Mol Microbiol.* **68**, 75-86.
- 977 19. Bleffert, F., Granzin, J., Caliskan, M., Schott-Verdugo, S., Siebers, M., Thiele, B., Rahme,  
978 L., Felgner, S., Doermann, P., Gohlke, H., Batra-Safferling, R., Jaeger, K.-E. & Kovacic, F.  
979 (2021) Evidence for a bacterial Lands cycle phospholipase A: Structural and mechanistic  
980 insights into membrane phospholipid remodeling, *bioRxiv*, 2021.06.22.448587.
- 981 20. Gendrin, C., Contreras-Martel, C., Bouillot, S., Elsen, S., Lemaire, D., Skoufias, D. A.,  
982 Huber, P., Attree, I. & Dessen, A. (2012) Structural basis of cytotoxicity mediated by the type  
983 III secretion toxin ExoU from *Pseudomonas aeruginosa*, *PLoS Pathog.* **8**, e1002637.
- 984 21. Murayama, K., Kano, K., Matsumoto, Y. & Sugimori, D. (2013) Crystal structure of  
985 phospholipase A1 from *Streptomyces albidoflavus* NA297, *J Struct Biol.* **182**, 192-6.
- 986 22. Tiesinga, J. J., van Pouderooyen, G., Nardini, M., Ransac, S. & Dijkstra, B. W. (2007)  
987 Structural basis of phospholipase activity of *Staphylococcus hyicus* lipase, *J Mol Biol.* **371**, 447-  
988 56.

- 989 23. Scandella, C. J. & Kornberg, A. (1971) A membrane-bound phospholipase A1 purified  
990 from *Escherichia coli*, *Biochemistry* **10**, 4447-56.
- 991 24. Snijder, H. J., Kingma, R. L., Kalk, K. H., Dekker, N., Egmond, M. R. & Dijkstra, B. W.  
992 (2001) Structural investigations of calcium binding and its role in activity and activation of outer  
993 membrane phospholipase A from *Escherichia coli*, *J Mol Biol.* **309**, 477-89.
- 994 25. Schmidt, D., Boehm, M., McClendon, C. L., Torella, R. & Gohlke, H. (2019) Cosolvent-  
995 Enhanced Sampling and Unbiased Identification of Cryptic Pockets Suitable for Structure-  
996 Based Drug Design, *J Chem Theory Comput.* **15**, 3331-3343.
- 997 26. Chovancova, E., Pavelka, A., Benes, P., Strnad, O., Brezovsky, J., Kozlikova, B., Gora,  
998 A., Sustr, V., Klvana, M., Medek, P., Biedermannova, L., Sochor, J. & Damborsky, J. (2012)  
999 CAVER 3.0: a tool for the analysis of transport pathways in dynamic protein structures, *PLoS*  
1000 *Comput Biol.* **8**, e1002708.
- 1001 27. Goldstein, D. A. & Solomon, A. K. (1960) Determination of equivalent pore radius for  
1002 human red cells by osmotic pressure measurement, *J Gen Physiol.* **44**, 1-17.
- 1003 28. Pan, J., Marquardt, D., Heberle, F. A., Kucerka, N. & Katsaras, J. (2014) Revisiting the  
1004 bilayer structures of fluid phase phosphatidylglycerol lipids: Accounting for exchangeable  
1005 hydrogens, *Biochim Biophys Acta.* **1838**, 2966-9.
- 1006 29. Izrailev, S., Stepaniants, S., Isralewitz, B., Kosztin, D., Lu, H., Molnar, F., Wriggers, W. &  
1007 Schulten, K. (1999). Steered Molecular Dynamics. Deuffhard P., Hermans J., Leimkuhler B.,  
1008 Mark A.E., Reich S., Skeel R.D. (Eds), Computational Molecular Dynamics: Challenges,  
1009 Methods, Ideas. Lecture Notes in Computational Science and Engineering, vol 4. Springer,  
1010 Berlin, Heidelberg, Germany.
- 1011 30. Jarzynski, C. (1997) Nonequilibrium equality for free energy differences, *Phys Rev Lett.*  
1012 **78**, 2690-2693.
- 1013 31. Bureau, H. R., Merz, D. R., Jr., Hershkovits, E., Quirk, S. & Hernandez, R. (2015)  
1014 Constrained Unfolding of a Helical Peptide: Implicit versus Explicit Solvents, *PLoS One.* **10**,  
1015 e0127034.
- 1016 32. Homeyer, N., Stoll, F., Hillisch, A. & Gohlke, H. (2014) Binding Free Energy Calculations  
1017 for Lead Optimization: Assessment of Their Accuracy in an Industrial Drug Design Context, *J*  
1018 *Chem Theory Comput.* **10**, 3331-3344.
- 1019 33. Izrailev, S., Crofts, A. R., Berry, E. A. & Schulten, K. (1999) Steered molecular dynamics  
1020 simulation of the Rieske subunit motion in the cytochrome bc(1) complex, *Biophys J.* **77**, 1753-  
1021 68.
- 1022 34. Torrie, G. M. & Valleau, J. P. (1977) Nonphysical sampling distributions in Monte Carlo  
1023 free-energy estimation: Umbrella sampling, *J Comput Phys.* **23**, 187-199.



- 1024 35. Kumar, S., Bouzida, D., Swendsen, R. H., Kollman, P. A. & Rosenberg, J. M. (1992) The  
1025 Weighted Histogram Analysis Method for Free-Energy Calculations on Biomolecules .1. The  
1026 Method, *J Comput Chem.* **13**, 1011-1021.
- 1027 36. Grossfield, A. (2016) WHAM: the weighted histogram analysis method, version 2.0.9.  
1028 Available online: <http://membrane.urmc.rochester.edu/content/wham> (accessed on 21 June  
1029 2021).
- 1030 37. Bisswanger, H. (2017) *Enzyme Kinetics: Principles and Methods*, 3<sup>rd</sup> edn., Wiley-VCH,  
1031 Weinheim, Germany.
- 1032 38. Nelson, D. L., Lehninger, A. L. & Cox, M. M. (2008) *Lehninger Principles of Biochemistry*,  
1033 5<sup>th</sup> edn., W.H. Freeman, New York, USA.
- 1034 39. Strunk, C. H. (2020) *Biochemische Charakterisierung der Phospholipase PlaF aus*  
1035 *Pseudomonas aeruginosa und ihres humanen Homologs ABHD6*, PhD Thesis, Heinrich Heine  
1036 University, Düsseldorf, Germany.
- 1037 40. Michel, J. & Essex, J. W. (2010) Prediction of protein-ligand binding affinity by free energy  
1038 simulations: assumptions, pitfalls and expectations, *J Comput Aided Mol Des.* **24**, 639-58.
- 1039 41. Biedermannova, L., Prokop, Z., Gora, A., Chovancova, E., Kovacs, M., Damborsky, J. &  
1040 Wade, R. C. (2012) A single mutation in a tunnel to the active site changes the mechanism and  
1041 kinetics of product release in haloalkane dehalogenase LinB, *J Biol Chem.* **287**, 29062-74.
- 1042 42. Friedman, R., Nachliel, E. & Gutman, M. (2005) Molecular dynamics of a protein surface:  
1043 ion-residues interactions, *Biophys J.* **89**, 768-81.
- 1044 43. Salamanca Vilorio, J., Allega, M. F., Lambrugh, M. & Papaleo, E. (2017) An optimal  
1045 distance cutoff for contact-based Protein Structure Networks using side-chain centers of mass,  
1046 *Sci Rep.* **7**, 2838.
- 1047 44. Cornell, C. E., Black, R. A., Xue, M., Litz, H. E., Ramsay, A., Gordon, M., Mileant, A.,  
1048 Cohen, Z. R., Williams, J. A., Lee, K. K., Drobny, G. P. & Keller, S. L. (2019) Prebiotic amino  
1049 acids bind to and stabilize prebiotic fatty acid membranes, *Proc Natl Acad Sci U S A* **116**,  
1050 17239-17244.
- 1051 45. Awasthi, M., Batra, J. & Kateriya, S. (2012) Disulphide bridges of phospholipase C of  
1052 *Chlamydomonas reinhardtii* modulates lipid interaction and dimer stability, *PLoS One.* **7**,  
1053 e39258.
- 1054 46. de Oliveira, A. H., Giglio, J. R., Andriao-Escarso, S. H., Ito, A. S. & Ward, R. J. (2001) A  
1055 pH-induced dissociation of the dimeric form of a lysine 49-phospholipase A2 abolishes Ca<sup>2+</sup>-  
1056 independent membrane damaging activity, *Biochemistry* **40**, 6912-20.
- 1057 47. Dekker, N., Tommassen, J., Lustig, A., Rosenbusch, J. P. & Verheij, H. M. (1997)  
1058 Dimerization regulates the enzymatic activity of Escherichia coli outer membrane  
1059 phospholipase A, *J Biol Chem.* **272**, 3179-84.

- 1060 48. Gomes, A. A. S., Cardoso, F. F., Souza, M. F., Oliveira, C. L. P., Perahia, D., Magro, A.  
1061 J. & Fontes, M. R. M. (2020) The allosteric activation mechanism of a phospholipase A2-like  
1062 toxin from *Bothrops jararacussu* venom: a dynamic description, *Sci Rep.* **10**, 16252.
- 1063 49. Kingma, R. L. & Egmond, M. R. (2002) Activation of a covalent outer membrane  
1064 phospholipase A dimer, *Eur J Biochem.* **269**, 2178-85.
- 1065 50. Malley, K. R., Koroleva, O., Miller, I., Sanishvili, R., Jenkins, C. M., Gross, R. W. & Korolev,  
1066 S. (2018) The structure of iPLA<sub>2</sub> $\beta$  reveals dimeric active sites and suggests mechanisms of  
1067 regulation and localization, *Nat Commun.* **9**, 765.
- 1068 51. Snijder, H. J., Ubarretxena-Belandia, I., Blaauw, M., Kalk, K. H., Verheij, H. M., Egmond,  
1069 M. R., Dekker, N. & Dijkstra, B. W. (1999) Structural evidence for dimerization-regulated  
1070 activation of an integral membrane phospholipase, *Nature* **401**, 717-721.
- 1071 52. Tomasselli, A. G., Hui, J., Fisher, J., Zürcher-Neely, H., Reardon, I. M., Oriaku, E., Kézdy,  
1072 F. J. & Henrikson, R. L. (1989) Dimerization and activation of porcine pancreatic phospholipase  
1073 A2 via substrate level acylation of lysine 56, *J Biol Chem.* **264**, 10041-10047.
- 1074 53. Kokkonen, P., Beier, A., Mazurenko, S., Damborsky, J., Bednar, D. & Prokop, Z. (2021)  
1075 Substrate inhibition by the blockage of product release and its control by tunnel engineering,  
1076 *RSC Chem Biol.* **2**, 645-655.
- 1077 54. Kokkonen, P., Slanska, M., Dockalova, V., Pinto, G. P., Sanchez-Carnerero, E. M.,  
1078 Damborsky, J., Klan, P., Prokop, Z. & Bednar, D. (2020) The impact of tunnel mutations on  
1079 enzymatic catalysis depends on the tunnel-substrate complementarity and the rate-limiting  
1080 step, *Comput Struct Biotechnol J.* **18**, 805-813.
- 1081 55. Lu, Z., Li, X., Zhang, R., Yi, L., Ma, Y. & Zhang, G. (2019) Tunnel engineering to accelerate  
1082 product release for better biomass-degrading abilities in lignocellulolytic enzymes, *Biotechnol*  
1083 *Biofuels.* **12**, 275.
- 1084 56. Wullich, S. C., Wijma, H. J., Janssen, D. B. & Fetzner, S. (2021) Stabilizing AqdC, a  
1085 *Pseudomonas* Quinolone Signal-Cleaving Dioxygenase from *Mycobacteria*, by FRESCO-  
1086 Based Protein Engineering, *Chembiochem.* **22**, 733-742.
- 1087 57. Mouchlis, V. D., Bucher, D., McCammon, J. A. & Dennis, E. A. (2015) Membranes serve  
1088 as allosteric activators of phospholipase A2, enabling it to extract, bind, and hydrolyze  
1089 phospholipid substrates, *Proc Natl Acad Sci U S A* **112**, E516-25.
- 1090 58. Cui, Y. L., Zheng, Q. C., Zhang, J. L. & Zhang, H. X. (2015) Molecular basis of the  
1091 recognition of arachidonic acid by cytochrome P450 2E1 along major access tunnel,  
1092 *Biopolymers* **103**, 53-66.
- 1093 59. Wu, D. (2010) An efficient umbrella potential for the accurate calculation of free energies  
1094 by molecular simulation, *J Chem Phys.* **133**, 044115.

- 1095 60. Yang, Y., Pan, L., Lightstone, F. C. & Merz, K. M., Jr. (2016) The Role of Molecular  
1096 Dynamics Potential of Mean Force Calculations in the Investigation of Enzyme Catalysis,  
1097 *Methods Enzymol.* **577**, 1-29.
- 1098 61. Ahmed, A., Rippmann, F., Barnickel, G. & Gohlke, H. (2011) A normal mode-based  
1099 geometric simulation approach for exploring biologically relevant conformational transitions in  
1100 proteins, *J Chem Inf Model.* **51**, 1604-22.
- 1101 62. Ciupka, D. & Gohlke, H. (2017) On the potential alternate binding change mechanism in  
1102 a dimeric structure of Pyruvate Phosphate Dikinase, *Sci Rep.* **7**, 8020.
- 1103 63. Domanski, J., Hedger, G., Best, R. B., Stansfeld, P. J. & Sansom, M. S. P. (2017)  
1104 Convergence and Sampling in Determining Free Energy Landscapes for Membrane Protein  
1105 Association, *J Phys Chem B.* **121**, 3364-3375.
- 1106 64. Rosta, E., Woodcock, H. L., Brooks, B. R. & Hummer, G. (2009) Artificial reaction  
1107 coordinate "tunneling" in free-energy calculations: the catalytic reaction of RNase H, *J Comput*  
1108 *Chem.* **30**, 1634-41.
- 1109 65. Neale, C. & Pomes, R. (2016) Sampling errors in free energy simulations of small  
1110 molecules in lipid bilayers, *Biochim Biophys Acta.* **1858**, 2539-2548.
- 1111 66. Waschenbach, L., Gertzen, C. G. W., Keitel, V. & Gohlke, H. (2020) Dimerization  
1112 energetics of the G-protein coupled bile acid receptor TGR5 from all-atom simulations, *J*  
1113 *Comput Chem.* **41**, 874-884.
- 1114 67. Tahir, M. A., Van Lehn, R. C., Choi, S. H. & Alexander-Katz, A. (2016) Solvent-exposed  
1115 lipid tail protrusions depend on lipid membrane composition and curvature, *Biochim Biophys*  
1116 *Acta.* **1858**, 1207-15.
- 1117 68. Hari, S. B., Grant, R. A. & Sauer, R. T. (2018) Structural and Functional Analysis of *E. coli*  
1118 Cyclopropane Fatty Acid Synthase, *Structure* **26**, 1251-1258 e3.
- 1119 69. Pavlova, M., Klvana, M., Prokop, Z., Chaloupkova, R., Banas, P., Otyepka, M., Wade, R.  
1120 C., Tsuda, M., Nagata, Y. & Damborsky, J. (2009) Redesigning dehalogenase access tunnels  
1121 as a strategy for degrading an anthropogenic substrate, *Nat Chem Biol.* **5**, 727-733.
- 1122 70. King, M. D. & Marsh, D. (1987) Head group and chain length dependence of phospholipid  
1123 self-assembly studied by spin-label electron spin resonance, *Biochemistry* **26**, 1224-31.
- 1124 71. Tieleman, D. P. & Marrink, S. J. (2006) Lipids out of equilibrium: energetics of desorption  
1125 and pore mediated flip-flop, *J Am Chem Soc.* **128**, 12462-7.
- 1126 72. Saura, P., Marechal, J. D., Masgrau, L., Lluch, J. M. & Gonzalez-Lafont, A. (2016)  
1127 Computational insight into the catalytic implication of head/tail-first orientation of arachidonic  
1128 acid in human 5-lipoxygenase: consequences for the positional specificity of oxygenation, *Phys*  
1129 *Chem Chem Phys.* **18**, 23017-35.

- 1130 73. Qian, H., Zhao, X., Yan, R., Yao, X., Gao, S., Sun, X., Du, X., Yang, H., Wong, C. C. L. &  
1131 Yan, N. (2020) Structural basis for catalysis and substrate specificity of human ACAT1, *Nature*  
1132 **581**, 333-338.
- 1133 74. Tong, S., Lin, Y., Lu, S., Wang, M., Bogdanov, M. & Zheng, L. (2016) Structural Insight  
1134 into Substrate Selection and Catalysis of Lipid Phosphate Phosphatase PgpB in the Cell  
1135 Membrane, *J Biol Chem.* **291**, 18342-52.
- 1136 75. Schmitt, J., Brocca, S., Schmid, R. D. & Pleiss, J. (2002) Blocking the tunnel: engineering  
1137 of *Candida rugosa* lipase mutants with short chain length specificity, *Protein Eng.* **15**, 595-601.
- 1138 76. Ibarguren, M., Lopez, D. J. & Escriba, P. V. (2014) The effect of natural and synthetic fatty  
1139 acids on membrane structure, microdomain organization, cellular functions and human health,  
1140 *Biochim Biophys Acta.* **1838**, 1518-28.
- 1141 77. Desbois, A. P. & Smith, V. J. (2010) Antibacterial free fatty acids: activities, mechanisms  
1142 of action and biotechnological potential, *Appl Microbiol Biotechnol.* **85**, 1629-42.
- 1143 78. Liu, H., Yu, C., Feng, D., Cheng, T., Meng, X., Liu, W., Zou, H. & Xian, M. (2012)  
1144 Production of extracellular fatty acid using engineered *Escherichia coli*, *Microb Cell Fact.* **11**,  
1145 41.
- 1146 79. Berman, H. M., Westbrook, J., Feng, Z., Gilliland, G., Bhat, T. N., Weissig, H., Shindyalov,  
1147 I. N. & Bourne, P. E. (2000) The Protein Data Bank, *Nucleic Acids Res.* **28**, 235-42.
- 1148 80. Bleffert, F., Granzin, J., Caliskan, M., Schott-Verdugo, S.N., Rahme, L., Siebers, M.,  
1149 Thiele, B., Doermann, P., Gohlke, H., Batra-Safferling, R., Kovacic, F., Jaeger, K.-E. (2019)  
1150 Structural and mechanistic insights into phospholipase A-mediated membrane phospholipid  
1151 degradation associated with bacterial virulence. PDB ID: 6I8W, DOI: 10.2210/pdb6I8W/pdb.
- 1152 81. Sali, A. & Blundell, T. L. (1993) Comparative protein modelling by satisfaction of spatial  
1153 restraints, *J Mol Biol.* **234**, 779-815.
- 1154 82. Lomize, M. A., Pogozheva, I. D., Joo, H., Mosberg, H. I. & Lomize, A. L. (2012) OPM  
1155 database and PPM web server: resources for positioning of proteins in membranes, *Nucleic*  
1156 *Acids Res.* **40**, D370-6.
- 1157 83. Conrad, R. S. & Gilleland, H. E., Jr. (1981) Lipid alterations in cell envelopes of polymyxin-  
1158 resistant *Pseudomonas aeruginosa* isolates, *J Bacteriol.* **148**, 487-97.
- 1159 84. Murzyn K, R. T., Pasenkiewicz-Gierula M (2005) Phosphatidylethanolamine-  
1160 phosphatidylglycerol bilayer as a model of the inner bacterial membrane, *Biophys J.* **88(2)**,  
1161 1091-1103.
- 1162 85. Jo, S., Lim, J. B., Klauda, J. B. & Im, W. (2009) CHARMM-GUI Membrane Builder for  
1163 mixed bilayers and its application to yeast membranes, *Biophys J.* **97**, 50-8.

- 1164 86. Schott-Verdugo, S. & Gohlke, H. (2019) PACKMOL-Memgen: A Simple-To-Use,  
1165 Generalized Workflow for Membrane-Protein-Lipid-Bilayer System Building, *J Chem Inf Model.*  
1166 **59**, 2522-2528.
- 1167 87. Case, D. A., Cheatham, T. E., 3rd, Darden, T., Gohlke, H., Luo, R., Merz, K. M., Jr.,  
1168 Onufriev, A., Simmerling, C., Wang, B. & Woods, R. J. (2005) The Amber biomolecular  
1169 simulation programs, *J Comput Chem.* **26**, 1668-1688.
- 1170 88. Le Grand, S., Gotz, A. W. & Walker, R. C. (2013) SPFP: Speed without compromise-A  
1171 mixed precision model for GPU accelerated molecular dynamics simulations, *Comput Phys*  
1172 *Commun.* **184**, 374-380.
- 1173 89. Maier, J. A., Martinez, C., Kasavajhala, K., Wickstrom, L., Hauser, K. E. & Simmerling, C.  
1174 (2015) ff14SB: Improving the Accuracy of Protein Side Chain and Backbone Parameters from  
1175 ff99SB, *J Chem Theory Comput.* **11**, 3696-713.
- 1176 90. D.A. Case, D. S. C., T.E. Cheatham, III, T.A. Darden, R.E. Duke, T.J. Giese, H. Gohlke,  
1177 A.W. Goetz, D.Greene,N. Homeyer, S. Izadi, A. Kovalenko, T.S. Lee, S. LeGrand, P. Li, C. Lin,  
1178 J. Liu, T. Luchko, R. Luo, D. Mermelstein, K.M. Merz, G. Monard, H. Nguyen, I. Omelyan, A.  
1179 Onufriev, F. Pan, R. Qi, D.R. Roe, A. Roitberg, C. Sagui, C.L. Simmerling, W.M. Botello-Smith,  
1180 J. Swails, R.C. Walker, J. Wang, R.M. Wolf, X. Wu, L. Xiao, D.M. York and P.A. Kollman (2017)  
1181 AMBER 2017 Reference Manual, University of California, San Francisco.
- 1182 91. Dickson, C. J., Madej, B. D., Skjevik, A. A., Betz, R. M., Teigen, K., Gould, I. R. & Walker,  
1183 R. C. (2014) Lipid14: The Amber Lipid Force Field, *J Chem Theory Comput.* **10**, 865-879.
- 1184 92. Skjevik, A. A., Madej, B. D., Dickson, C. J., Lin, C., Teigen, K., Walker, R. C. & Gould, I.  
1185 R. (2016) Simulation of lipid bilayer self-assembly using all-atom lipid force fields, *Phys Chem*  
1186 *Chem Phys.* **18**, 10573-84.
- 1187 93. Jorgensen, W. L., Chandrasekhar, J., Madura, J. D., Impey, R. W. & Klein, M. L. (1983)  
1188 Comparison of Simple Potential Functions for Simulating Liquid Water, *J Chem Phys.* **79**, 926-  
1189 935.
- 1190 94. Ryckaert, J. P., Ciccotti, G. & Berendsen, H. J. C. (1977) Numerical-Integration of  
1191 Cartesian Equations of Motion of a System with Constraints - Molecular-Dynamics of N-  
1192 Alkanes, *J Comput Phys.* **23**, 327-341.
- 1193 95. Darden, T., York, D. & Pedersen, L. (1993) Particle mesh Ewald: An N-log(N) method for  
1194 Ewald sums in large systems, *J Chem Phys.* **98**, 10089-10092.
- 1195 96. Quigley, D. & Probert, M. I. (2004) Langevin dynamics in constant pressure extended  
1196 systems, *J Chem Phys.* **120**, 11432-41.
- 1197 97. Berger, O., Edholm, O. & Jahnig, F. (1997) Molecular dynamics simulations of a fluid  
1198 bilayer of dipalmitoylphosphatidylcholine at full hydration, constant pressure, and constant  
1199 temperature, *Biophys J.* **72**, 2002-2013.

- 1200 98. Berendsen, H. J. C., Postma, J. P. M., van Gunsteren, W. F., DiNola, A. & Haak, J. R.  
1201 (1984) Molecular dynamics with coupling to an external bath, *J Chem Phys.* **81**, 3684-3690.
- 1202 99. Roe, D. R. & Cheatham, T. E., 3rd (2013) PTRAJ and CPPTRAJ: Software for Processing  
1203 and Analysis of Molecular Dynamics Trajectory Data, *J Chem Theory Comput.* **9**, 3084-95.
- 1204 100. Schrodinger, LLC (2015) The PyMOL Molecular Graphics System, Version 1.8
- 1205 101. Humphrey, W., Dalke, A. & Schulten, K. (1996) VMD: Visual molecular dynamics, *J.*  
1206 *Molec. Graphics.* **14**, 33-38.
- 1207 102. Paloncova, M., Berka, K. & Otyepka, M. (2012) Convergence of Free Energy Profile of  
1208 Coumarin in Lipid Bilayer, *J Chem Theory Comput.* **8**, 1200-1211.
- 1209 103. Marrink, S.-J., Berger, O., Tieleman, P. & Jähnig, F. (1998) Adhesion Forces of Lipids in  
1210 a Phospholipid Membrane Studied by Molecular Dynamics Simulations, *Biophys J.* **74**, 931-  
1211 943.
- 1212 104. Chen, P. C. & Kuyucak, S. (2011) Accurate determination of the binding free energy for  
1213 KcsA-charybdotoxin complex from the potential of mean force calculations with restraints,  
1214 *Biophys J.* **100**, 2466-74.
- 1215 105. Schymkowitz, J., Borg, J., Stricher, F., Nys, R., Rousseau, F. & Serrano, L. (2005) The  
1216 FoldX web server: an online force field, *Nucleic Acids Res.* **33**, W382-8.
- 1217 106. Guerois, R., Nielsen, J. E. & Serrano, L. (2002) Predicting changes in the stability of  
1218 proteins and protein complexes: A study of more than 1000 mutations, *J Mol Biol.* **320**, 369-  
1219 387.
- 1220 107. Tokuriki, N., Stricher, F., Schymkowitz, J., Serrano, L. & Tawfik, D. S. (2007) The stability  
1221 effects of protein mutations appear to be universally distributed, *J Mol Biol.* **369**, 1318-32.
- 1222 108. Li, M. Z. & Elledge, S. J. (2007) Harnessing homologous recombination in vitro to  
1223 generate recombinant DNA via SLIC, *Nat. Methods* **4**, 251-6.
- 1224 109. Bleffert, F., Granzin, J., Gohlke, H., Batra-Safferling, R., Jaeger, K.-E. & Kovacic, F.  
1225 (2019) *Pseudomonas aeruginosa* esterase PA2949, a bacterial homolog of the human  
1226 membrane esterase ABHD6: expression, purification and crystallization, *Acta Crystallogr F.* **75**,  
1227 270-277.
- 1228 110. Laemmli, U. K. (1970) Cleavage of structural proteins during the assembly of the head  
1229 of bacteriophage T4, *Nature* **227**, 680-685.
- 1230 111. Jaeger, K. E. & Kovacic, F. (2014) Determination of lipolytic enzyme activities, *Methods*  
1231 *Mol Biol.* **1149**, 111-134.
- 1232 112. Kovacic, F., Granzin, J., Wilhelm, S., Kojic-Prodic, B., Batra-Safferling, R. & Jaeger, K.  
1233 E. (2013) Structural and functional characterisation of TesA - a novel lysophospholipase A from  
1234 *Pseudomonas aeruginosa*, *PLoS One.* **8**, e69125.

- 1235 113. Viegas, A., Dollinger, P., Verma, N., Kubiak, J., Viennet, T., Seidel, C. A. M., Gohlke, H.,  
1236 Etkorn, M., Kovacic, F. & Jaeger, K.-E. (2020) Structural and dynamic insights revealing how  
1237 lipase binding domain MD1 of *Pseudomonas aeruginosa* foldase affects lipase activation, *Sci*  
1238 *Rep.* **10**, 3578.
- 1239 114. Bayly, C. I., Cieplak, P., Cornell, W. & Kollman, P. A. (1993) A well-behaved electrostatic  
1240 potential based method using charge restraints for deriving atomic charges: the RESP model,  
1241 *J Phys Chem.* **97**, 10269-10280.
- 1242 115. Wang, J., Wang, W., Kollman, P. A. & Case, D. A. (2006) Automatic atom type and bond  
1243 type perception in molecular mechanical calculations, *J Mol Graph Model.* **25**, 247-60.
- 1244 116. Frisch, M. J., Trucks, G. W., Schlegel, H. B., Scuseria, G. E., Robb, M. A., Cheeseman,  
1245 J. R., Scalmani, G., Barone, V., Petersson, G. A., Nakatsuji, H., Li, X., Caricato, M., Marenich,  
1246 A. V., Bloino, J., Janesko, B. G., Gomperts, R., Mennucci, B., Hratchian, H. P., Ortiz, J. V.,  
1247 Izmaylov, A. F., Sonnenberg, J. L., Williams-Young, D., Ding, F., Lipparini, F., Egidi, F., Goings,  
1248 J., Peng, B., Petrone, A., Henderson, T., Ranasinghe, D., Zakrzewski, V. G., Gao, J., Rega, N.,  
1249 Zheng, G., Liang, W., Hada, M., Ehara, M., Toyota, K., Fukuda, R., Hasegawa, J., Ishida, M.,  
1250 Nakajima, T., Honda, Y., Kitao, O., Nakai, H., Vreven, T., Throssell, K., Montgomery Jr., J. A.,  
1251 Peralta, J. E., Ogliaro, F., Bearpark, M. J., Heyd, J. J., Brothers, E. N., Kudin, K. N., Staroverov,  
1252 V. N., Keith, T. A., Kobayashi, R., Normand, J., Raghavachari, K., Rendell, A. P., Burant, J. C.,  
1253 Iyengar, S. S., Tomasi, J., Cossi, M., Millam, J. M., Klene, M., Adamo, C., Cammi, R., Ochterski,  
1254 J. W., Martin, R. L., Morokuma, K., Farkas, O., Foresman, J. B. & Fox, D. J. (2016) Gaussian  
1255 16 Revision A.03 in Gaussian, Inc., Wallingford, CT, .
- 1256 117. Wang, J., Wolf, R. M., Caldwell, J. W., Kollman, P. A. & Case, D. A. (2004) Development  
1257 and testing of a general amber force field, *J Comput Chem.* **25**, 1157-74.

1258
